# Supplementary material for: Functional pH-responsive polymers containing dynamic enaminone linkages for the release of active organic amines
Source: Royal Society of Chemistry journal article supplement (doi:10.1039/d2py00167e), 2022-01-01
Supplement: d2py00167e1.pdf [file d2py00167e1.pdf]

## Electronic Supplementary Information

### Functional pH-responsive polymers containing dynamic enaminone linkages for the release of active organic amines

Spyridon Efstathiou,<sup>a</sup> Congkai Ma,<sup>a</sup> Despina Coursari,<sup>a</sup> Georgios Patias,<sup>a</sup> Lucas Al-Shok,<sup>a</sup> Ahmed M. Eissa<sup>a,b\*</sup> and David M. Haddleton<sup>a\*</sup>

<sup>a</sup>Department of Chemistry, University of Warwick, Gibbet Hill Road, CV4 7AL, Coventry, UK

<sup>b</sup>Department of Polymers, Chemical Industries Research Division, National Research Centre, El Bohouth St. 33, Dokki, Giza 12622, Cairo, Egypt

#### Contents

|      |                                                                                                                                                     |    |
|------|-----------------------------------------------------------------------------------------------------------------------------------------------------|----|
| 1    | Experimental.....                                                                                                                                   | 2  |
| 1.1  | Materials .....                                                                                                                                     | 2  |
| 1.2  | Instrumentation .....                                                                                                                               | 2  |
| 1.3  | Experimental Procedures .....                                                                                                                       | 5  |
| 2    | Supplementary analysis and experimental data .....                                                                                                  | 11 |
| 2.1  | Characterisation of synthesised mPEG <sub>x</sub> -BPA (x = 43 or 113) macroinitiators.....                                                         | 11 |
| 2.2  | Optimisation experiments for the synthesis of pAEMA homopolymers by photoinduced Cu(II)-mediated RDRP .....                                         | 14 |
| 2.3  | Characterisation of pAEMA homopolymers synthesised by photoinduced Cu(II)-RDRP ...                                                                  | 16 |
| 2.4  | Characterisation of mPEG <sub>x</sub> - <i>b</i> -pAEMA <sub>y</sub> block copolymers synthesised by photoinduced Cu(II)-RDRP .....                 | 19 |
| 2.5  | Polymerisation Kinetic studies .....                                                                                                                | 20 |
| 2.6  | Modification results of pAEMA homopolymers with propylamine .....                                                                                   | 23 |
| 2.7  | Hydrolysis experiment and proposed mechanism.....                                                                                                   | 24 |
| 2.8  | Modification results of pAEMA <sub>x</sub> homopolymers and mPEG <sub>x</sub> - <i>b</i> -pAEMA <sub>y</sub> block copolymers with benzocaine ..... | 25 |
| 2.9  | Thermal Characterisation of synthesised products .....                                                                                              | 29 |
| 2.10 | Stability studies, DLS and Zeta potential data of block copolymers .....                                                                            | 29 |
| 2.11 | Benzocaine release UV data at different pH environments .....                                                                                       | 33 |
| 3    | References .....                                                                                                                                    | 33 |

# 1 Experimental

## 1.1 Materials

2-(Acetoacetoxy)ethyl methacrylate (AEMA, 95%, passed through a column of activated basic alumina prior use), methyl  $\alpha$ -bromophenylacetate (MBPA, 97%), propylamine (PR, 98%),  $\alpha$ -bromophenyl acetic acid (98%), copper(II) bromide (Cu(II)Br<sub>2</sub>, 99%), benzocaine (BNZ, HPLC,  $\geq$  99%), *p*-Toluenesulfonic acid monohydrate (*p*-TsOH ACS reagent,  $\geq$  98.5%), 2-(hydroxy)ethyl methacrylate (HEMA, 98%) and Celite® S were purchased from Sigma-Aldrich. Poly(ethylene glycol) monomethyl ether (mPEG<sub>113</sub>-OH,  $M_n = 5,000$  g.mol<sup>-1</sup>) was also purchased from Sigma-Aldrich. Poly(ethylene glycol) monomethyl ether (mPEG<sub>43</sub>-OH,  $M_n = 1,900$  g.mol<sup>-1</sup>), *N, N'*-dicyclohexylcarbodiimide (DCC, 99%), and dimethyl sulfoxide were purchased from Alfa Aesar by Thermo Fisher Scientific. 4-(Dimethylamino)pyridine (DMAP,  $\geq$  99%) was purchased from ReagentPlus® while *tris*(2-(dimethylamino)ethyl)amine (Me<sub>6</sub>TREN) was synthesised according to previously reported literature.<sup>1</sup> Regenerated cellulose dialysis membranes were purchased from Spectra/Por® with a MWCO cut-off of 2 kDa and 1 kDa. Phosphate buffers 0.2 M pH 4.4, 3.5 and 6.6 were purchased from Alfa Aesar. All materials were used as received unless otherwise stated.

## 1.2 Instrumentation

**Size exclusion chromatography (SEC)** analysis was performed on an Agilent Infinity II MDS instrument equipped with differential refractive index (DRI) and dual ultraviolet (UV) detectors. The mobile phase was DMF + 5mM NH<sub>4</sub>BF<sub>4</sub> at 50 °C with a flow rate of 1 mL min<sup>-1</sup> and an injection volume of 100  $\mu$ L, while poly(methyl methacrylate) (PMMA) standards (purchased from Agilent EasyVials) were used as calibrants. The instrument was equipped with 2 x PolarGel Mixed D columns (300 x 7.5 mm) and a PLgel 5  $\mu$ m guard column. Polymers were dissolved in DMF and filtered through a GVHP nylon membrane (0.22  $\mu$ m pore size) before analysis. Experimental molar mass ( $M_{n, SEC}$ ) and dispersities ( $\mathcal{D}$ ) were calculated using Agilent GPC/SEC software.

**<sup>1</sup>H-NMR, <sup>13</sup>C-NMR, and DOSY-NMR** spectra were recorded in a Bruker DPX-400 or 500 MHz instrument using deuterated dimethyl sulfoxide (DMSO-d<sub>6</sub>) as a solvent. Chemical shifts are given as  $\delta$  in parts per million (ppm). For the kinetic experiments, the monomer percent conversions were determined using the above equation:

$$\text{Conv. (\%)} = (1 - \int I_{6.04ppm}) \times 100$$

Where  $\int I_{6.04ppm}$  corresponds to the integral of a monomer vinyl proton after referencing the  $-\text{CH}_2\text{CH}_2$  of the side chain as  $\int I_{4.00 - 4.50ppm} = 4$ .

All spectra were analysed using ACD/NMR Processor software.

**Infrared spectroscopy** was performed in a Bruker ALPHA II Fourier transform infrared (FTIR) spectrometer fitted with a crystal plate and a pressure tower running at 65 scans per sample with a speed of  $0.5 \text{ cm s}^{-1}$ .

**Matrix-assisted laser desorption/ionization-time of flight mass spectrometry (MALDI-ToF MS)** was performed on a Bruker Autoflex Speed MALDI-ToF mass spectrometer, equipped with a nitrogen laser delivering 2 ns laser pulses at 337 nm with positive ion ToF detection with an accelerating voltage of 25 kV. Solutions were prepared as follows: *trans*-2-[3-(4-*tert*-Butylphenyl)-2-methyl-2-propenylidene] malononitrile as the matrix ( $40 \text{ mg mL}^{-1}$ ) and the polymer sample ( $10 \text{ mg mL}^{-1}$ ) were each dissolved in THF containing sodium iodide as a cationizing agent ( $1 \text{ mg mL}^{-1}$ ). 20  $\mu\text{L}$  of matrix and sample were mixed and 0.5  $\mu\text{L}$  of the final solution was applied on the target plate. Spectra recording was made in reflective mode calibrating with PEG 5,000 Da.

**Differential scanning calorimetry (DSC)** was carried on a TA DSC 2500 instrument under nitrogen flow ( $50 \text{ mL min}^{-1}$ ) with a heating rate of  $10 \text{ }^\circ\text{C min}^{-1}$ . Samples were loaded in 40  $\mu\text{L}$  aluminum pans and heated for two cycles in total between  $-100$  and  $200 \text{ }^\circ\text{C}$ . All presented data concern the 2<sup>nd</sup> cycle thermograms.

**UV-Vis spectra** were recorded on an Agilent Technologies Cary 60 UV-Vis spectrometer in the range of 200-500 nm using HPLC graded water as a solvent. A glass cuvette (from HELLMA) with a 10 mm optical length was used for all measurements.

**Gas chromatography flame ionization detection (GC-FID)** was performed on a Shimadzu GC2014 equipped with a Shimadzu AO20i autosampler. The instrument had a polar Stabilwax-DA column (length 30 m, 0.32 mm ID and 0.25  $\mu\text{m}$  film thickness) with hydrogen as the carrier

gas. An injection volume of 1  $\mu\text{L}$  was used with a 39-split ratio. The injection temperature was 250  $^{\circ}\text{C}$  and the flame temperature was 300  $^{\circ}\text{C}$ . The heating profile was 60 – 200  $^{\circ}\text{C}$  at a rate of 10  $^{\circ}\text{C min}^{-1}$  and 200-240  $^{\circ}\text{C}$  at a rate of 15  $^{\circ}\text{C min}^{-1}$  held for 3 min. Samples were prepared by dissolving few drops in  $\text{CHCl}_3$ .

**Transmission Electron Microscopy (TEM)** images were obtained using a Jeol 2100 plus microscope, operated at 200 kV, and fitted with a Gatan Orius 11 megapixel digital camera. Samples were prepared by drop-casting a few milliliters of sample dispersions after ultrasonication onto holey carbon grids, allowing the solvent to evaporate and leaving the sample to rest for 24 h at ambient temperature.

**Dynamic Light Scattering (DLS)** was used to determine the hydrodynamic diameter ( $D_h$ ) and the size distribution (PD) of the nano-assemblies using an Anton-Paar Litesizer 500 equipped with a 40 mW - 658 nm laser diode source. Experiments were conducted at 25  $^{\circ}\text{C}$  with a 175  $^{\circ}$  measurement angle (backscatter), an equilibration time of 12 min, and polystyrene latex as the reference material (RI = 1.585, Abs. coefficient = 0.0010). All determinations were carried out in triplicates with a maximum number of 60 runs per measurement. Solvents were filtered through a 0.45  $\mu\text{m}$  *Fisher brand* nylon syringe filter prior use to remove undesirable dust particles.

**Zeta Potential Analysis** took place on an Anton-Paar Litesizer 500 at room temperature using distilled water (pH = 7) as the analysis media while applying a voltage of 10 V. The reported zeta potential data were an average of three runs with 40 measurements recorded per run.

**UV photo polymerisations:** Small scale photo polymerisations were conducted under a *Mylee* UV nail gel curing lamp equipped with four 9 W bulbs emitting at  $\lambda_{\text{max}} \sim 365$  nm. For bigger scale reactions, a custom-made UV box with  $\lambda_{\text{max}} \sim 360$  nm was used.

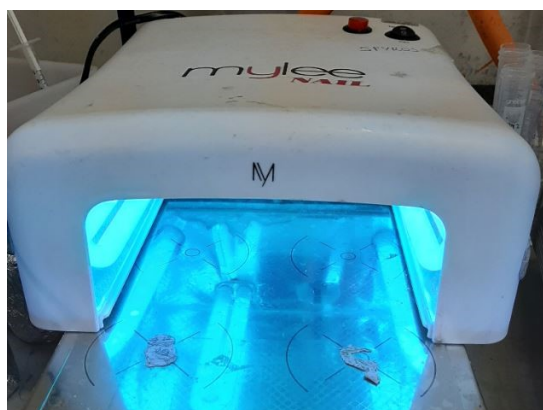

**Figure S1.** UV curing lamp equipped with four 9 W bulbs emitting at  $\lambda_{\text{max}} \sim 365$  nm for small scale

photo polymerisations.

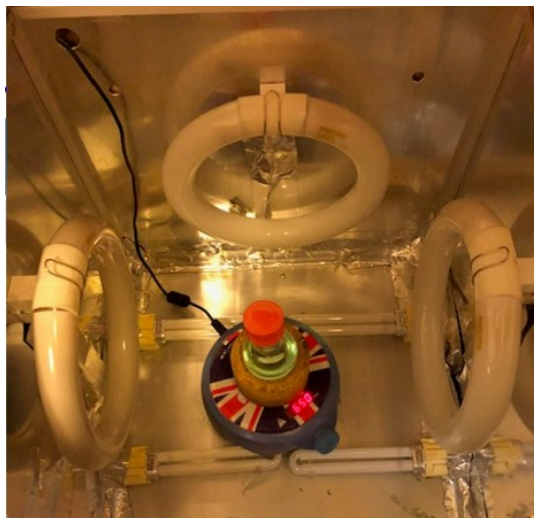

**Figure S2.** Custom-made UV box set up with  $\lambda_{\text{max}} \sim 360$  nm used for higher scale photo polymerisations.

### 1.3 Experimental Procedures

#### Poly(ethylene glycol) monomethyl ether-2-bromo-2-phenylacetate macroinitiator synthesis by DCC coupling

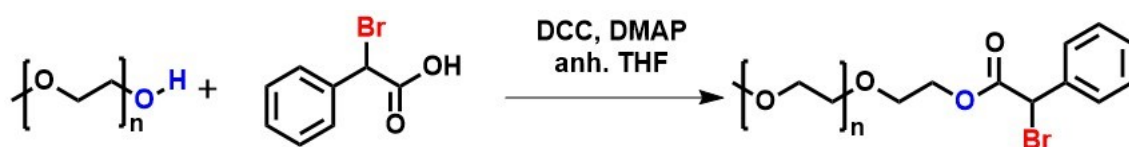

mPEG<sub>113</sub>-OH (20.0 g, 4.0 mmol, 1 eq.) was dissolved in anhydrous THF (150 mL) in a dry two-neck round bottom flask equipped with a magnetic stir bar. After complete dissolution of the polymer flakes, the flask was immersed in an ice bath and sealed with a rubber septum under nitrogen flow. DMAP (0.1 g, 0.8 mmol, 0.2 eq.), DCC (1.65 g, 8.0 mmol, 2 eq.) and  $\alpha$ -bromophenyl acetic acid (3.4 g, 16.0 mmol, 4 eq.) were added successively. The reaction was let at 0 °C for 2 h and at room temperature for another 24 h until a second addition of DMAP (0.65 g, 5.3 mmol, 1 eq.) and DCC (2.19 g, 10.6 mmol, 2 eq.) was followed by cannulating a degassed mixture of them in anhydrous THF (6 mL) leaving the reaction for additional 24 h. The resulting mixture was filtered to remove most insoluble impurities and concentrated at a lower volume. The concentrated solution was left at -20 °C for at least 2 h and filtered ( $\times 2$ )

through Celite® S to receive a clear yellow solution. The resulting solution was finally concentrated and precipitated ( $\times 2$ ) in cold diethyl ether. Solids were filtered and dried under vacuum for 24 h to receive a pale-yellow solid (70 % yield) referred as mPEG<sub>113</sub>-BPA. The modification efficiency was found to be > 99% based on <sup>1</sup>H-NMR (400 MHz, DMSO-d<sub>6</sub>) integrations in combination with the complete disappearance of the –OH peaks at  $\delta = 4.56$  ppm.

<sup>1</sup>H-NMR (400 MHz, DMSO-d<sub>6</sub>),  $\delta$  (ppm): 3.25 (s, 3H, -O-CH<sub>3</sub>), 3.51 (s, 168H, -O-CH<sub>2</sub>-CH<sub>2</sub>), 4.27 (m, 2H, -CH<sub>2</sub>-O-CH<sub>2</sub>-CH<sub>2</sub>-O-CO), 5.95 (s, 1H, CH-Br), 7.40 (m, 3H, aromatic ring) and 7.57 (d, 2H, J = 6.72, aromatic ring).

<sup>13</sup>C-NMR (400 MHz, DMSO-d<sub>6</sub>),  $\delta$  (ppm): 47.3 (C-Br), 58.5 (CH<sub>3</sub>-O-), 65.9 (CH<sub>2</sub>-CH<sub>2</sub>-O-CO), 68.4 (CH<sub>2</sub>-CH<sub>2</sub>-O-CO), 70.3 (-O-CH<sub>2</sub>-CH<sub>2</sub>), 71.8 (CH<sub>3</sub>-O-CH<sub>2</sub>-), 127.1 (=CH-CH=CH-), 129.2 (=CH-CH=CH-), 129.6 (=CH-C-(CBr)=CH-), 136.7 (=CH-C-(CBr)=CH-) and 168.5 (O-CO-CBr-).

FT-IR (v, cm<sup>-1</sup>): 698 (C-Br stretch), 1,750 (C=O)

mPEG<sub>113</sub>-BPA :  $M_{n, SEC} = 8,800 \text{ g.mol}^{-1}$  ( $\mathcal{D} = 1.05$ ) and mPEG<sub>43</sub>-BPA :  $M_{n, SEC} = 4,400 \text{ g.mol}^{-1}$  ( $\mathcal{D} = 1.06$ )

### Synthesis of pAEMA homopolymers *via* photoinduced Cu-RDRP

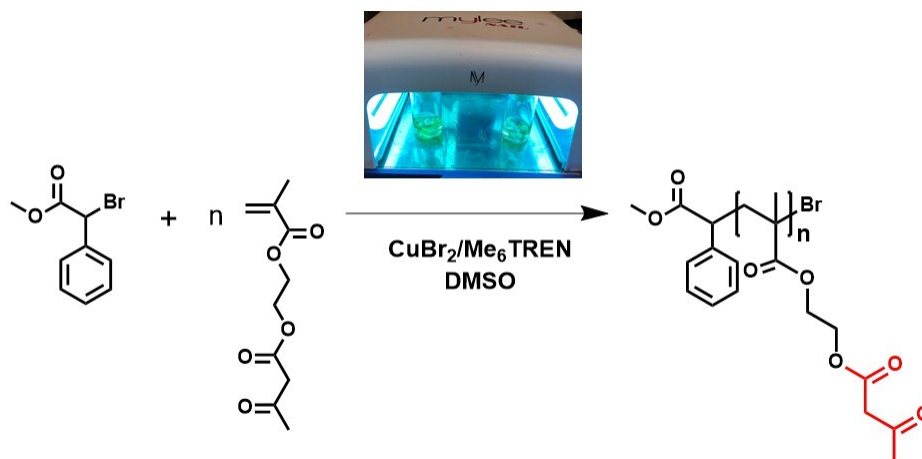

For a targeted  $DP_{n, target} = 80$ , an aluminum foiled vial was charged with Cu(II)Br<sub>2</sub> (1.5 mg, 0.05 eq.), Me<sub>6</sub>TREN (12.6  $\mu$ L, 0.36 eq.) and DMSO (2 mL) following sonication for  $\sim 1$  min until complete dissolution of the copper complex. AEMA (2 mL, 0.02 mol, 80 eq.), MBPA (20.6  $\mu$ L, 1 eq.) along with a magnetic stir bar were added and the vial was sealed with a rubber septum and degassed for 20 min with nitrogen. The aluminum foil was removed and the degassed reaction mixture was immediately exposed to UV light ( $\lambda_{max} \sim 365 \text{ nm}$ ) for the polymerisation to commence. The reaction was UV irradiated for 12 h to reach > 99 % conversion based on <sup>1</sup>H-NMR. After the pass of polymerisation, the mixture was diluted with

THF and passed through an activated alumina column to remove copper. Finally, polymers were precipitated ( $\times 3$ ) in a mixture of cold H<sub>2</sub>O: MeOH (2:1) to remove potential unreacted substances following freeze-drying to yield purified **pAEMA<sub>80</sub>** homopolymers. Products were finally analysed by NMR and SEC to determine the degree of polymerisation (DP<sub>n</sub>) and dispersity (*D*).

### Synthesis of **mPEG<sub>x</sub>-b-pAEMA<sub>y</sub>** block copolymers *via* photoinduced Cu-RDRP

For a chain extension using mPEG<sub>43</sub>-BPA macroinitiator targeting DP<sub>n, target</sub> = 80, Cu(II)Br<sub>2</sub> (1.5 mg, 0.05 eq.), Me<sub>6</sub>TREN (12.6 μL, 0.36 eq.), DMSO (0.5 mL) and a magnetic stir bar were charged in an aluminum foiled vial which was sonicated for ~ 1 min until complete dissolution of the copper complex. In a second vial, synthesised mPEG<sub>43</sub>-BPA macroinitiator ( $M_{n, NMR} = 2,097 \text{ g mol}^{-1}$ , 0.26 g, 1 eq.) was dissolved in DMSO (1.5 mL) following addition of AEMA (2 mL, 0.01 mol, 80 eq.). The mixture was carefully transferred to the first vial which was sealed with a rubber septum and degassed for 20 min with nitrogen. The polymerisation mixture was immediately exposed to UV light ( $\lambda_{max} \sim 365 \text{ nm}$ ) for 12 h reaching > 99 % conversion. The reaction was diluted with THF and passed through activated alumina to remove the remaining copper salts. Polymers were then precipitated ( $\times 3$ ) in a mixture of cold EtOH: MeOH (2:1) to remove any unreacted monomer and unconsumed macroinitiator. The blocks were finally dried under vacuum to yield purified **mPEG<sub>43</sub>-b-pAEMA<sub>y</sub>** block copolymers. The same protocol was followed using mPEG<sub>113</sub>-BPA macroinitiator with the difference of using a [Cu(II)Br<sub>2</sub>] : [Me<sub>6</sub>TREN] = [0.1] : [0.72] ratio yielding **mPEG<sub>113</sub>-b-pAEMA<sub>y</sub>** block copolymers.

### Functionalisation of **pAEMA<sub>42</sub>** homopolymers with propylamine

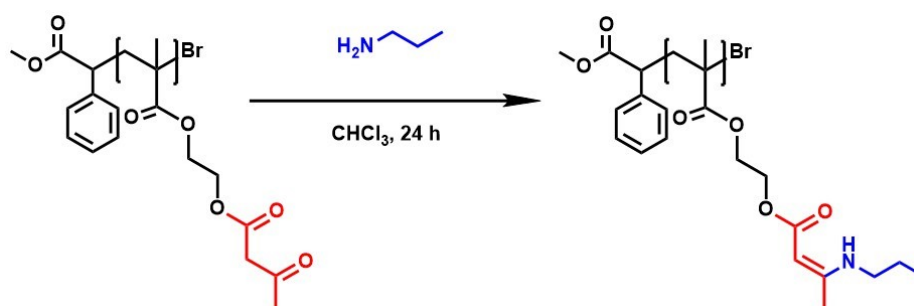

In a typical modification procedure, purified pAEMA<sub>42</sub> (0.1 g,  $n_{\text{pol.}} = 0.01$  mmol,  $M_{\text{n, NMR}} = 9,200$  g mol<sup>-1</sup>,  $D = 1.33$ ,  $n_{\text{-acet.}} = 0.42$  mmol, 1 eq.) was charged in a vial and dissolved in CHCl<sub>3</sub> (4.0 mL). Propylamine (69 μL, 2 eq. to the moles of acetoacetate groups ( $n_{\text{-acet.}}$ ) was added and the reaction was let for 24 h at ambient temperature. The reaction mixture was concentrated under suppressed air and precipitated once in cold MeOH. The precipitate was collected after centrifugation and dried under vacuum at 40 °C for 24 h to remove the remaining solvents and the excess propylamine (b.p. = 48 °C). The modified pAEMA<sub>42</sub>/PrA was analysed by NMR and FT-IR to determine the modification efficiency (%).

### Acid hydrolysis of pAEMA<sub>42</sub>/PrA modified homopolymers

Modified pAEMA<sub>42</sub>/PrA (0.1 g,  $n_{\text{-PR.}} = 0.36$  mmol,  $M_{\text{n, NMR}} = [\text{MW}_{\text{MBPA}} + (\text{DP}_{\text{acet.}} \times \text{MW}_{\text{AEMA}})] + [\text{DP}_{\text{PR}} \times (\text{MW}_{\text{AEMA}} + \text{MW}_{\text{PR}} - 18)] = 10,800$  g mol<sup>-1</sup>, 93 % modification based on <sup>1</sup>H-NMR) was dissolved in 4 mL of THF. Excess of H<sub>3</sub>PO<sub>4</sub> 85 wt% (38 μL, 0.72 mmol, 2 eq.) was added and the hydrolysis was let for 24 h. After 24 h, white propylamine salt appeared and removed by centrifugation while the supernatant was dialyzed against THF (MWCO = 2 kDa dialysis membrane) to remove any excess acid. Finally, the solvent was removed *in vacuo* and the hydrolysed polymers were dried under vacuum at 40 °C.

### Functionalisation protocol of homopolymers and block copolymers with benzocaine

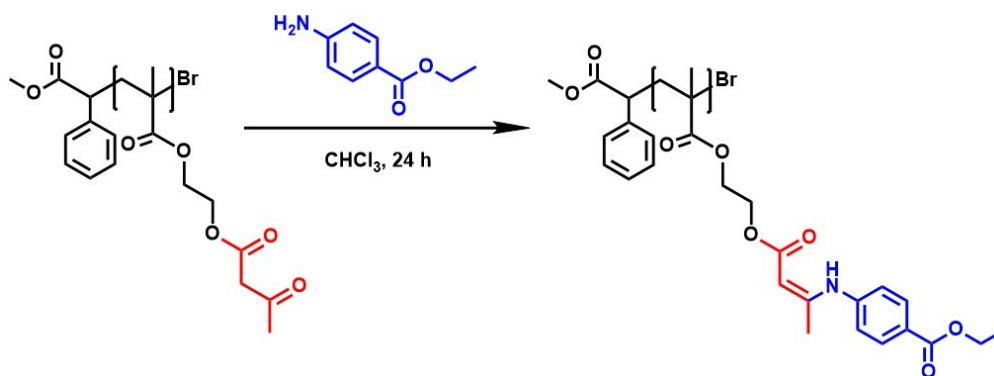

In a typical modification, purified pAEMA<sub>42</sub> (0.5 g,  $n_{\text{pol.}} = 0.05$  mmol,  $M_{\text{n, NMR}} = 9,200$  g mol<sup>-1</sup>,  $D = 1.33$ ,  $n_{\text{-acet.}} = 2.1$  mmol, 1.0 eq.) was dissolved in ~ 7.0 mL of CHCl<sub>3</sub>. Benzocaine (2.1 g, 12.6 mmol, 6 eq. to the moles of acetoacetate groups) and a stir bar were added and the reaction was let for 24 h at 40 °C. The modified polymers were precipitated (× 3) in cold diethyl ether under fast stirring and dried under vacuum at 25 °C to yield purified pAEMA<sub>42</sub>/BNZ



(**modification efficiency %**) modified polymers. A similar protocol was followed for the modification of mPEG<sub>x</sub>-b-pAEMA<sub>y</sub> block copolymers. The temperature, solvent, and eq. of BNZ were altered depending on the desired degree of modification while p-TsOH was included in the recipe to boost modification when required. Finally, polymers were characterised by NMR and FT-IR to determine the modification efficiency (%).

### Nanoparticles formation *via* the direct dilution method

2 mg of mPEG<sub>x</sub>-b-pAEMA<sub>y</sub> block copolymer were dissolved in 4 mL of previously filtered DI water at ambient temperature. This solution was sonicated for 10 min until complete dissolution of the blocks leading to a 0.5 mg mL<sup>-1</sup> opaque solution of nanoparticles. A similar procedure was used for the benzocaine modified blocks. Nanoparticles were characterised by DLS and TEM.

### Stock and working solutions of benzocaine

A 200 μM stock solution of benzocaine was initially prepared by transferring 3.3 mg of BNZ in a 100 mL volumetric flask and dissolving in 1 mL of absolute ethanol. Then, the volume was made up to 100 mL with Milli-Q® water following 5 min sonication. Working solutions of different concentrations were then prepared (between 0.5 and 16.5 μg mL<sup>-1</sup>) by diluting the stock solution appropriately.

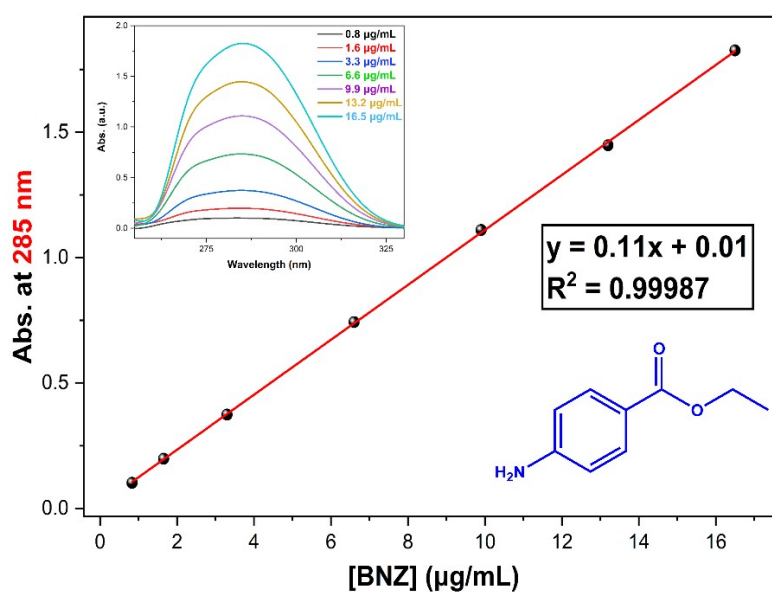

**Figure S3.** Calibration curve of benzocaine molecule in water recorded at  $\lambda_{\max} = 285$  nm.

### ***In vitro* release study of benzocaine modified mPEG<sub>113</sub>-b-pAEMA<sub>28</sub>/BNZ(70 %) NPs**

A more accurate determination of benzocaine's dosage ( $\mu\text{g}$ ) in the studied NPs was conducted using  $^1\text{H-NMR}$  spectroscopy with a known amount of DCM as the internal standard. It was found that 2.5 mg of block copolymers contained 700  $\mu\text{g}$  of benzocaine. A 100 mg  $\text{mL}^{-1}$  stock solution of mPEG<sub>113</sub>-b-pAEMA<sub>28</sub>/BNZ(70 %) NPs was prepared in DMF keeping it in the freezer to avoid amine release. As an example, 25  $\mu\text{L}$  from the stock were injected into 5 mL of DI water giving a solution of 0.5 mg  $\text{mL}^{-1}$  (containing 0.5 % of DMF). The solution of NPs was transferred to a 1 kDa dialysis bag, immersed in a 50 mL falcon tube containing 40 mL of the desired phosphate buffer (pH = 3.5, 4.4, and 6.6) and incubated under gentle agitation at 37 °C. At designated time points, 2 mL of buffer solution were collected and replaced with 2 mL of fresh benzocaine-free buffer. The collected samples were analysed by UV-Vis and the concentration of benzocaine at it each time point was calculated by fitting with benzocaine's calibration curve recorded at  $\lambda_{\text{max}} = 285 \text{ nm}$ , Figure S3. The cumulative percent release was determined using the formula :<sup>2</sup>

$$\text{Cumulative Release \%} = \frac{V_{\text{total}} \times C_j + V_{\text{sample}} \times \sum_{n=1}^{n-1} C_n}{m_{\text{drug}}}$$

where  $V_{\text{total}}$  stands for the total volume of buffer (40 mL),  $V_{\text{sample}}$  the sampling volume (2 mL),  $m_{\text{drug}}$  the initial mass of benzocaine in the NPs ( $\mu\text{g}$ ) and  $C_n$  and  $C_j$  the benzocaine concentration at  $j$  and  $n$  sampling times ( $\mu\text{g mL}^{-1}$ ).

### **Stability study of amphiphilic block copolymers in water**

In three separate vials, 10 mg of mPEG<sub>43</sub>-b-pAEMA<sub>25</sub> were loaded along with 2 mL of DI H<sub>2</sub>O creating micellar solutions of 5 mg  $\text{mL}^{-1}$ . The first vial was left for 1 day, the second for 5 days and the third for 14 days. Water was removed by freeze drying and a  $^1\text{H-NMR}$  spectra of the remaining block copolymers was attained monitoring the  $-\text{CH}_2$  peak of HEMA unit at  $\delta = 3.91 \text{ ppm}$ .

## 2 Supplementary analysis and experimental data

### 2.1 Characterisation of synthesised mPEG<sub>x</sub>-BPA (x = 43 or 113) macroinitiators

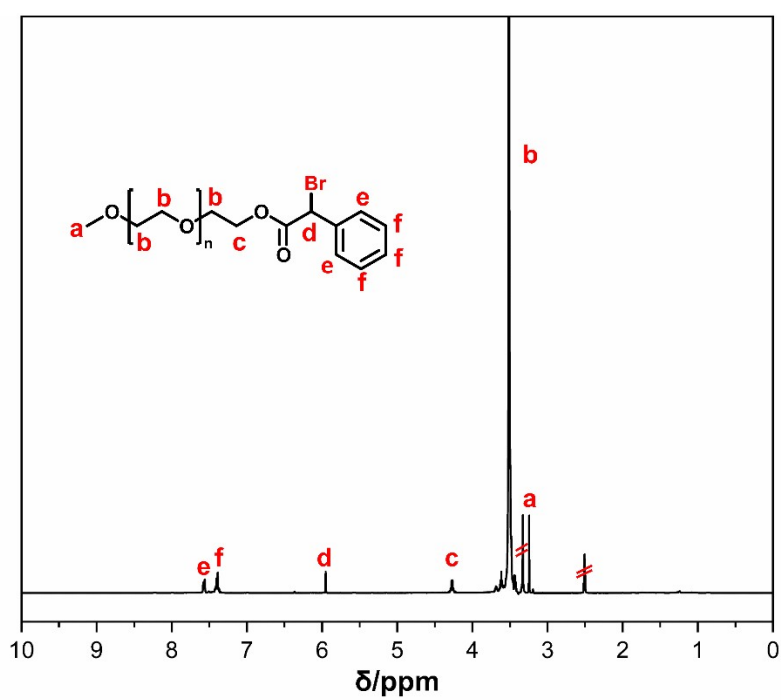

**Figure S4.** <sup>1</sup>H-NMR (400 MHz, DMSO-d<sub>6</sub>) spectrum of mPEG<sub>43</sub>-BPA macroinitiator.

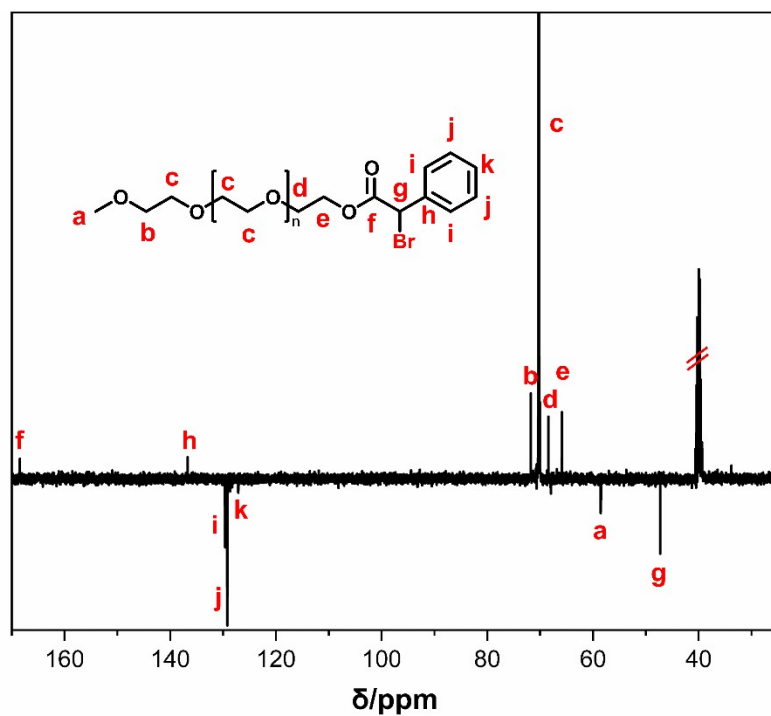

**Figure S5.**  $^{13}\text{C}$ -NMR (400 MHz,  $\text{DMSO-d}_6$ ) spectrum of the synthesised mPEG<sub>43</sub>-BPA macroinitiator.

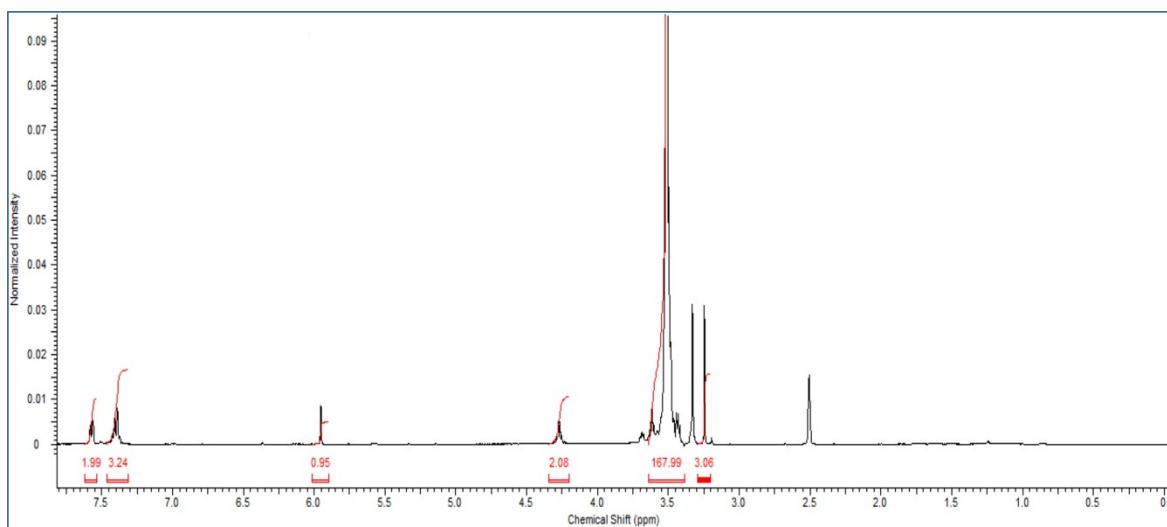

**Figure S6.** Integrated  $^1\text{H}$ -NMR (400 MHz,  $\text{DMSO-d}_6$ ) peaks of mPEG<sub>43</sub>-BPA synthesised macroinitiator.

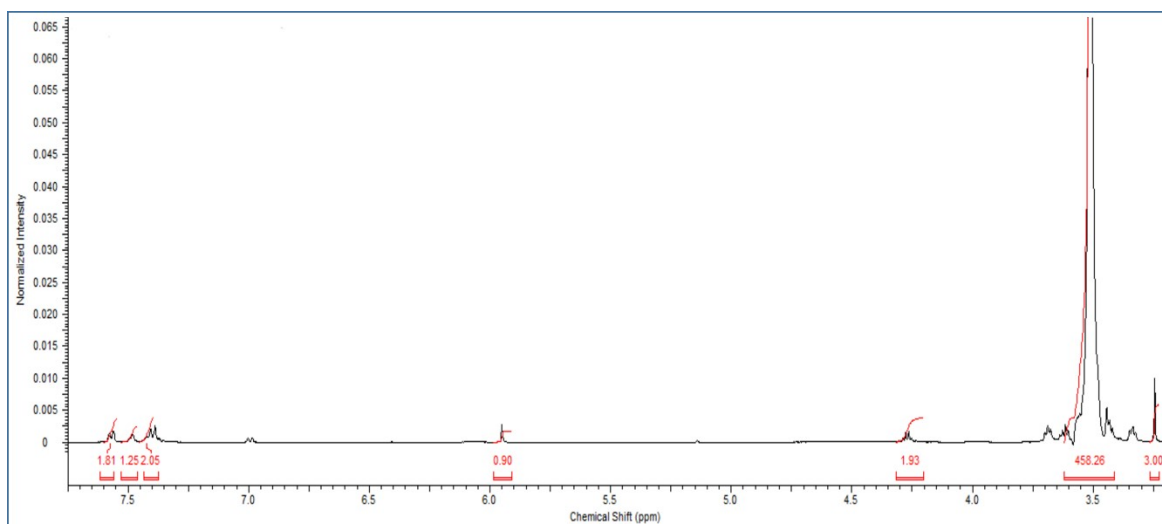

**Figure S7.** Integrated  $^1\text{H-NMR}$  (400 MHz,  $\text{DMSO-d}_6$ ) peaks of  $\text{mPEG}_{113}\text{-BPA}$  synthesised macroinitiator.

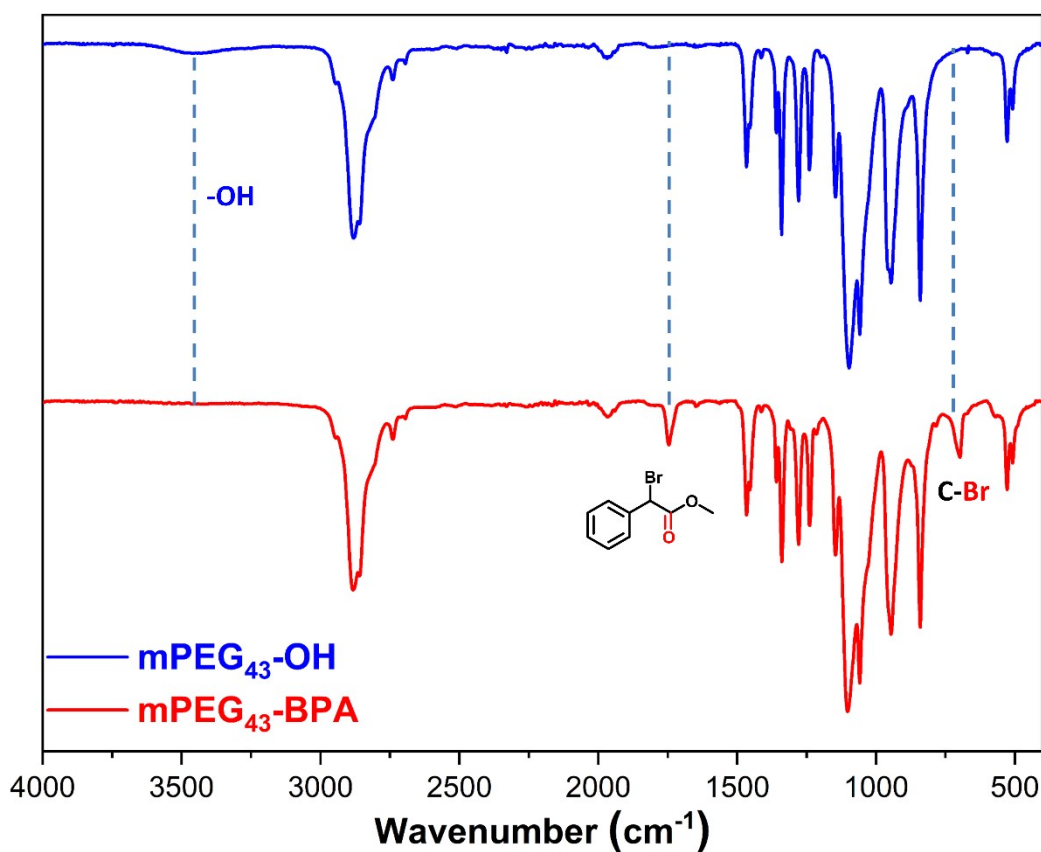

**Figure S8.** FT-IR spectrum of the synthesised  $\text{mPEG}_{43}\text{-BPA}$  macroinitiator using  $\text{mPEG}_{43}\text{-OH}$  as a precursor.

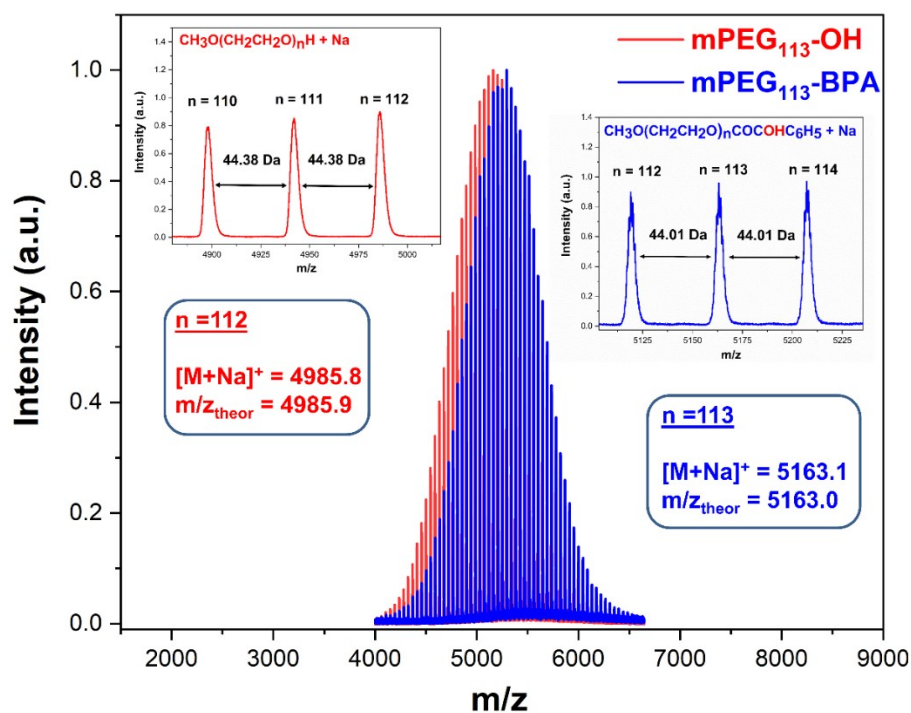

Figure S9. MALDI-ToF MS spectra comparison of mPEG<sub>113</sub>-OH and mPEG<sub>113</sub>-BPA macroinitiator.

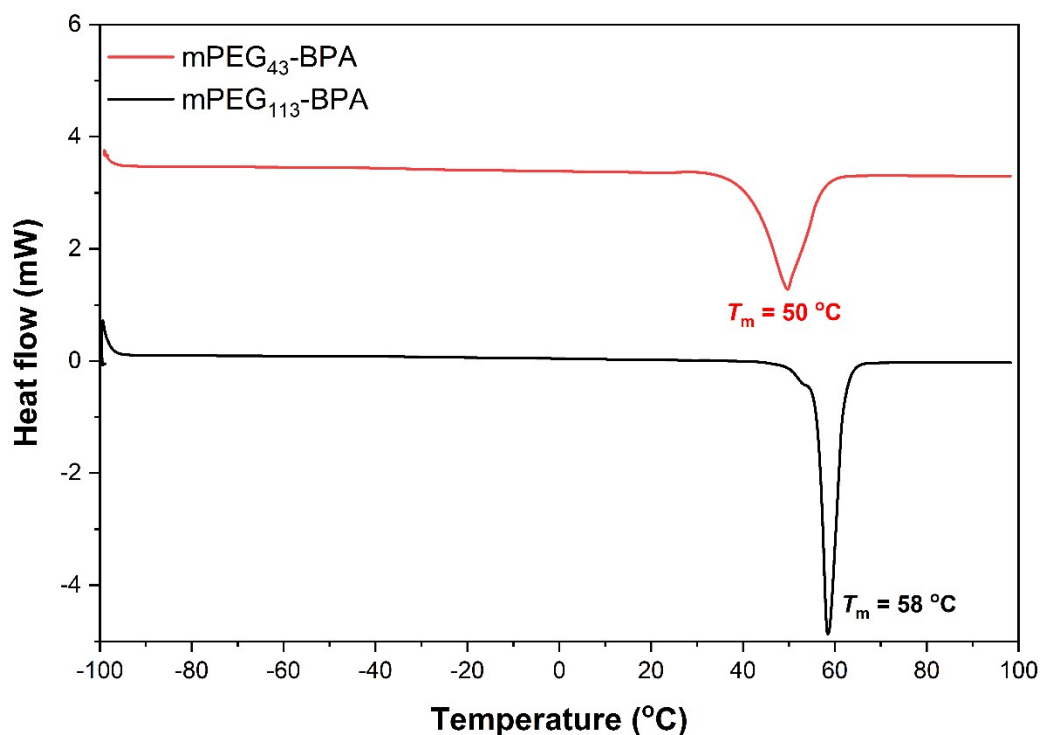

Figure S10. DSC analysis of mPEG<sub>x</sub>-BPA ( $x = 43$  or  $113$ ) synthesised macroinitiators.

## 2.2 Optimisation experiments for the synthesis of pAEMA homopolymers by photoinduced Cu(II)-mediated RDRP

**Table 1.** Polymerisation data from the optimisation reactions of the photoinduced Cu(II)-mediated RDRP of AEMA in DMSO using as I : MBPA and L : Me<sub>6</sub>TREN. Polymerisation time for all reactions was 12 h.

| Entry | [AEMA]:[I]:[Cu <sup>II</sup> ]:[L] | Conv. (%) | $\bar{D}$ | $M_{n,SEC}$ (g mol <sup>-1</sup> ) | $M_{n,th}$ (g mol <sup>-1</sup> ) | $M_{n,NMR}$ (g mol <sup>-1</sup> ) | $DP_{n,NMR}$ |
|-------|------------------------------------|-----------|-----------|------------------------------------|-----------------------------------|------------------------------------|--------------|
| 1     | 40:1:0.10:0.18                     | 20        | 2.16      | 10,260                             | 8,800                             | 1,900                              | 8            |
| 2     | 40:1:0.03:0.21                     | 1         | -         | -                                  | 8,800                             | -                                  | -            |
| 3     | 40:1:0.04:0.29                     | 87        | 1.44      | 17,900                             | 8,800                             | 9,800                              | 45           |

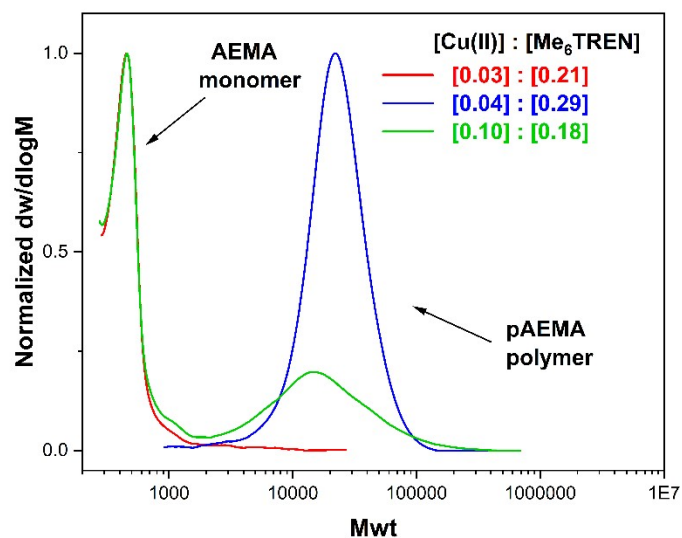

**Figure S11.** Molecular weight distribution traces from the crude optimisation reactions of AEMA using photoinduced Cu(II)-RDRP as measured by SEC in DMF.

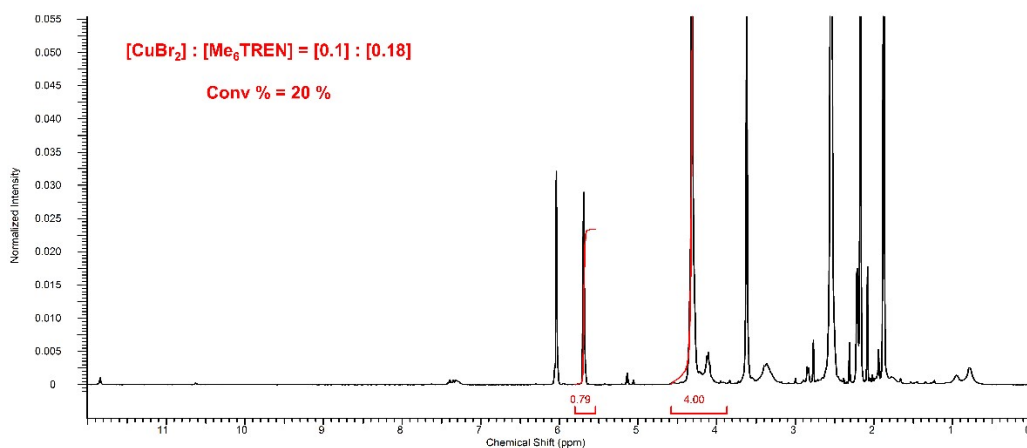

**Figure S12** .  $^1\text{H-NMR}$  (400 MHz,  $\text{DMSO-d}_6$ ) spectra of the crude reaction after the photoinduced  $\text{Cu(II)-RDRP}$  polymerisation of AEMA using a ratio of  $[\text{CuBr}_2] : [\text{Me}_6\text{TREN}] = [0.1] : [0.18]$  after 12 h.

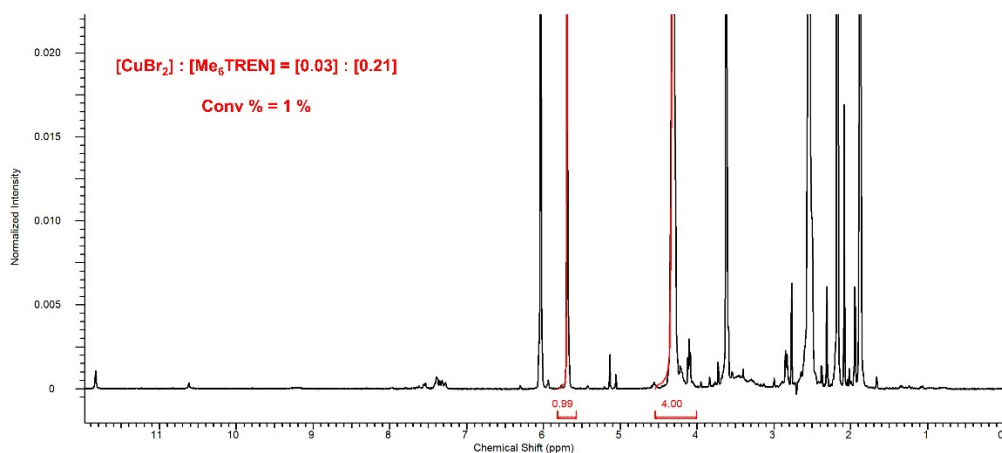

**Figure S13** .  $^1\text{H-NMR}$  (400 MHz,  $\text{DMSO-d}_6$ ) spectra of the crude reaction after the photoinduced  $\text{Cu(II)-RDRP}$  polymerization of AEMA using a ratio of  $[\text{CuBr}_2] : [\text{Me}_6\text{TREN}] = [0.03] : [0.21]$  after 12 h.

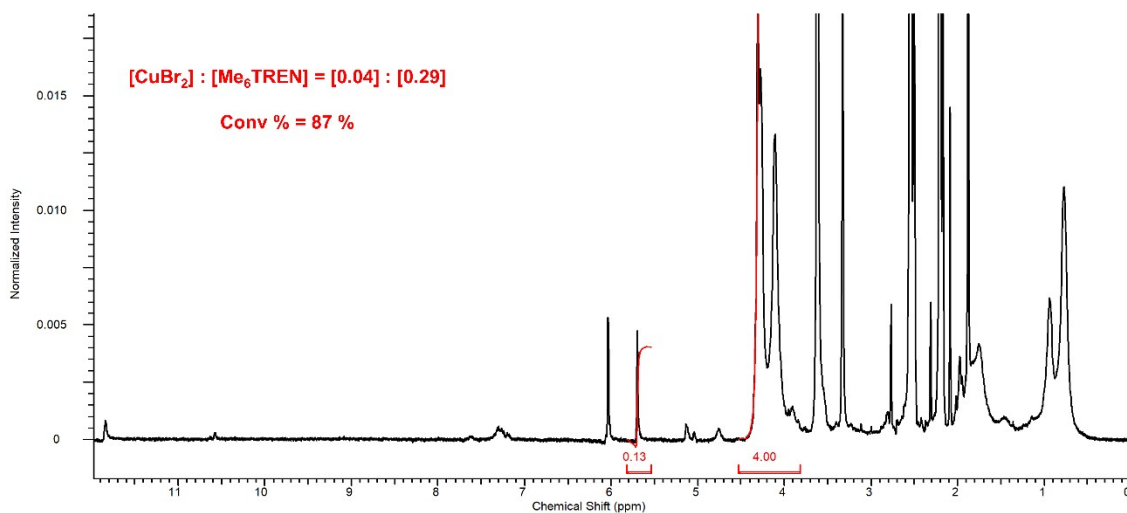

**Figure S14** .  $^1\text{H-NMR}$  (400 MHz,  $\text{DMSO-d}_6$ ) spectra of the crude reaction after the photoinduced  $\text{Cu(II)-RDRP}$  polymerisation of AEMA using a ratio of  $[\text{CuBr}_2] : [\text{Me}_6\text{TREN}] = [0.04] : [0.29]$  after 12 h.



## 2.3 Characterisation of pAEMA homopolymers synthesised by photoinduced Cu(II)-RDRP

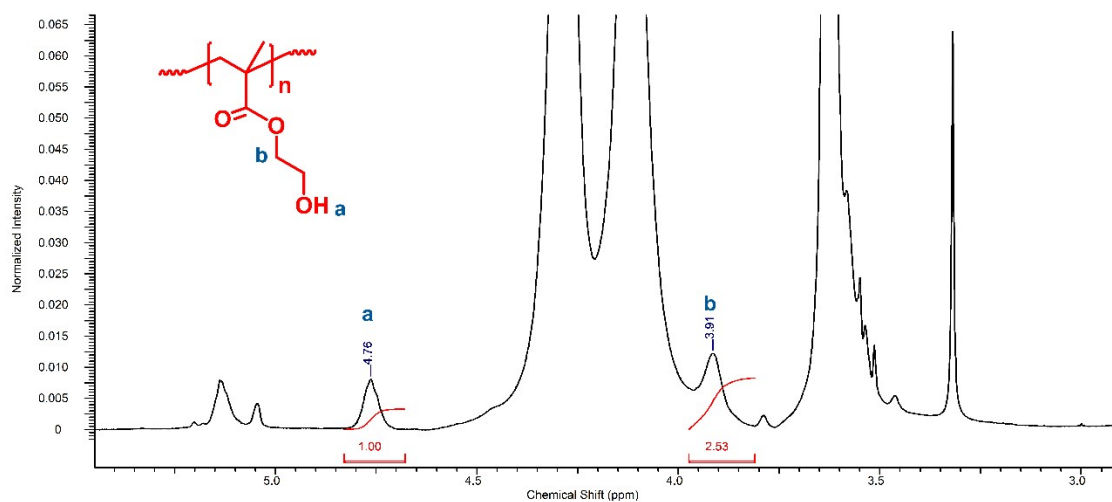

**Figure S15 .** <sup>1</sup>H-NMR (400 MHz, DMSO-d<sub>6</sub>) spectra of a synthesised pAEMA<sub>38</sub> homopolymer proving the existence of pHEMA units.

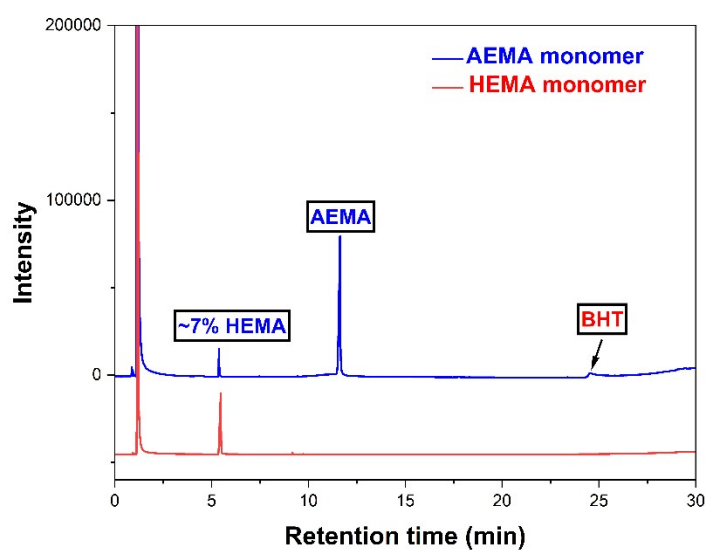

**Figure S16 .** GC-FID analysis of AEMA commercial monomer in CHCl<sub>3</sub> and comparison with HEMA monomer.

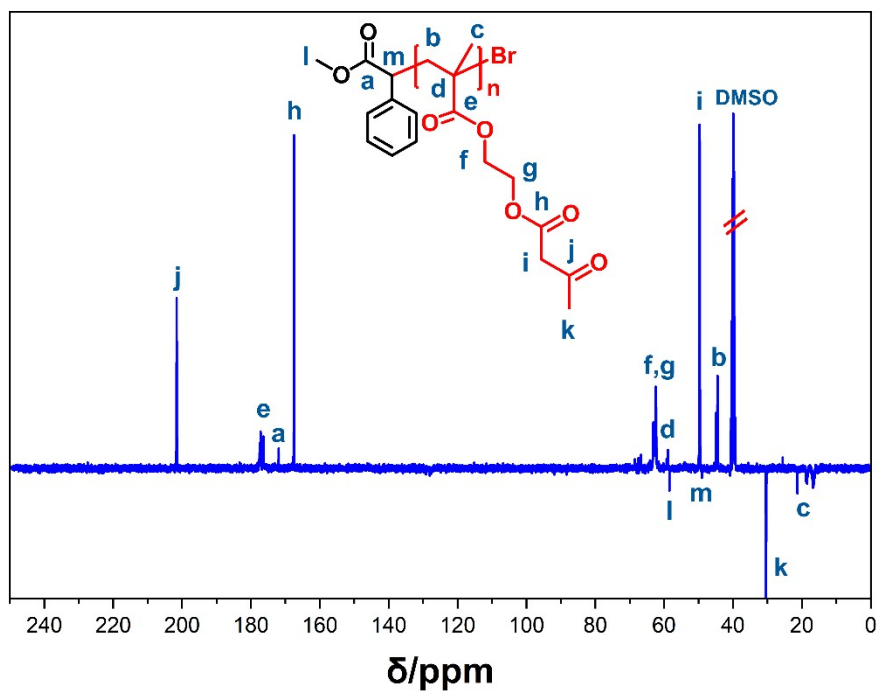

**Figure S17.**  $^{13}\text{C}$ -NMR (500 MHz,  $\text{DMSO-d}_6$ ) spectra of a synthesised pAEMA<sub>38</sub> homopolymer.

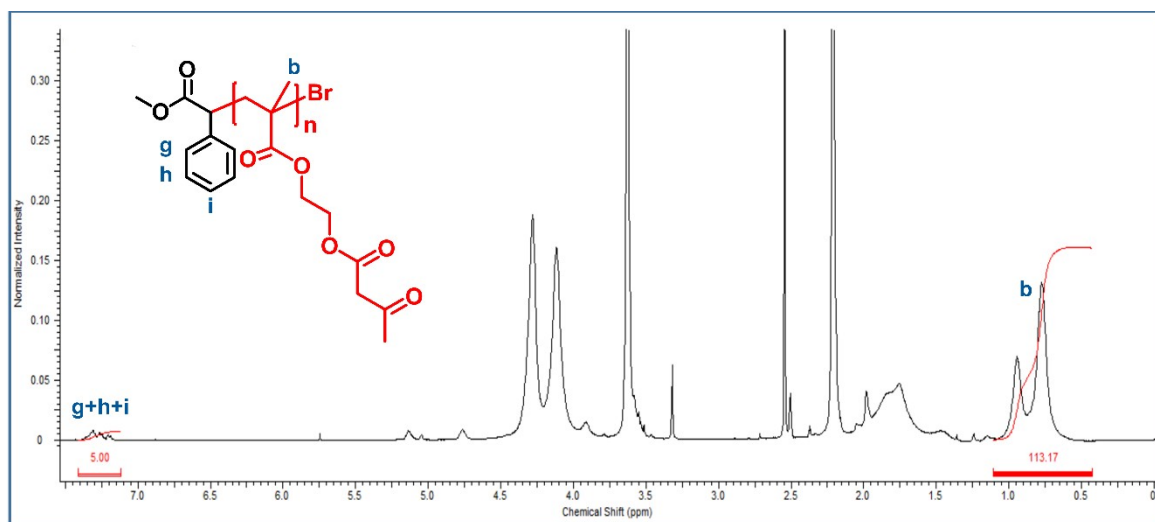

**Figure S18.** Integrated  $^1\text{H}$ -NMR (400 MHz,  $\text{DMSO-d}_6$ ) peaks of purified pAEMA<sub>38</sub> after targeting  $\text{DP}_{\text{target}} = 40$ .

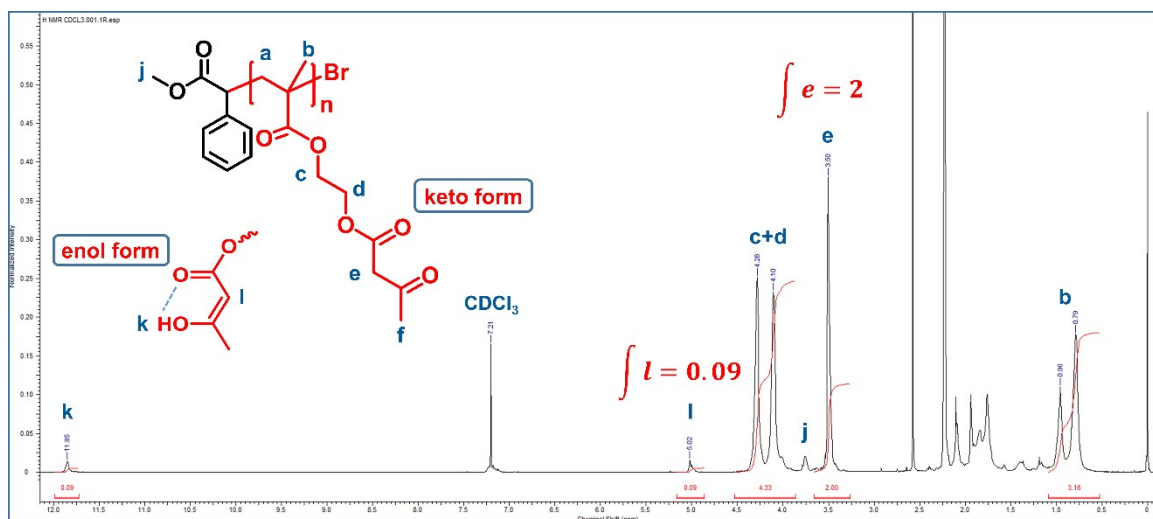

**Figure S19.** Integrated  $^1\text{H-NMR}$  (400 MHz,  $\text{CDCl}_3$ ) spectra of purified  $\text{pAEMA}_{38}$  showing the percent ratio composition between keto and enol form. Based on the integrals, 92% of units exist as a keto form.

## 2.4 Characterisation of $\text{mPEG}_x\text{-}b\text{-pAEMA}_y$ block copolymers synthesised by photoinduced $\text{Cu(II)-RDRP}$

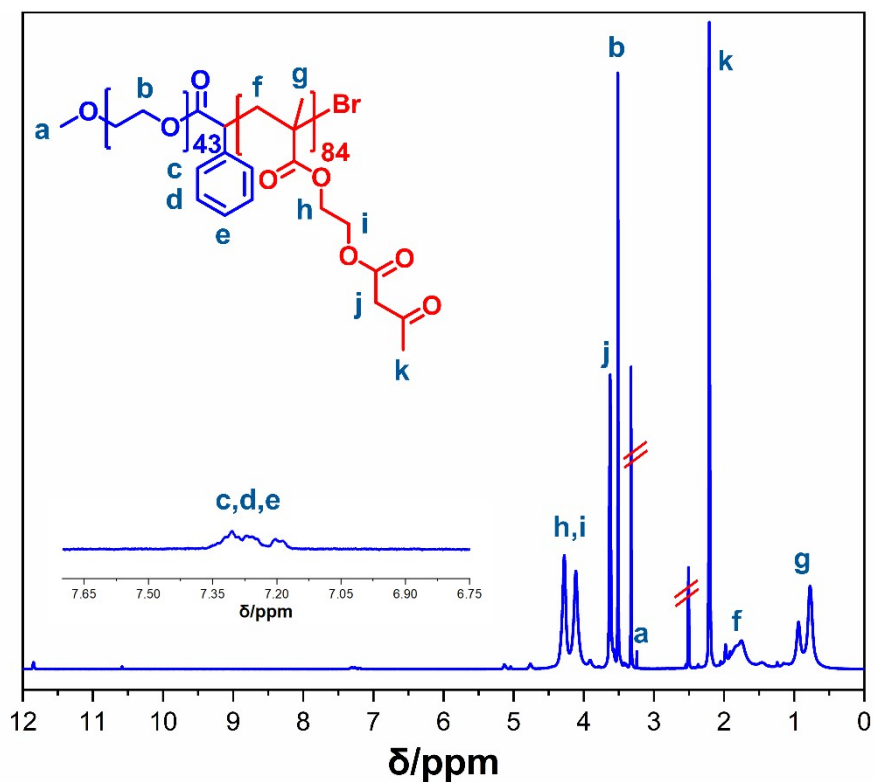

**Figure S20.**  $^1\text{H-NMR}$  (400 MHz,  $\text{DMSO-d}_6$ ) spectra of a synthesised  $\text{mPEG}_{43}\text{-}b\text{-pAEMA}_{84}$  block copolymer.

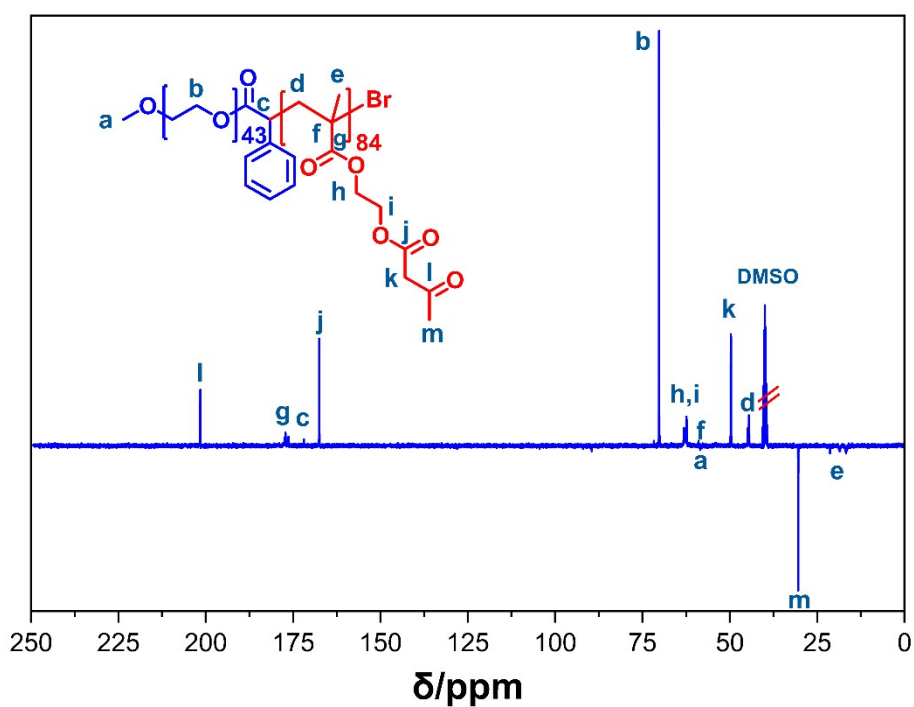

**Figure S21.**  $^{13}\text{C-NMR}$  (500 MHz,  $\text{DMSO-d}_6$ ) spectra of a synthesised  $\text{mPEG}_{43}\text{-}b\text{-pAEMA}_{84}$  block copolymer.

## 2.5 Polymerisation Kinetic studies

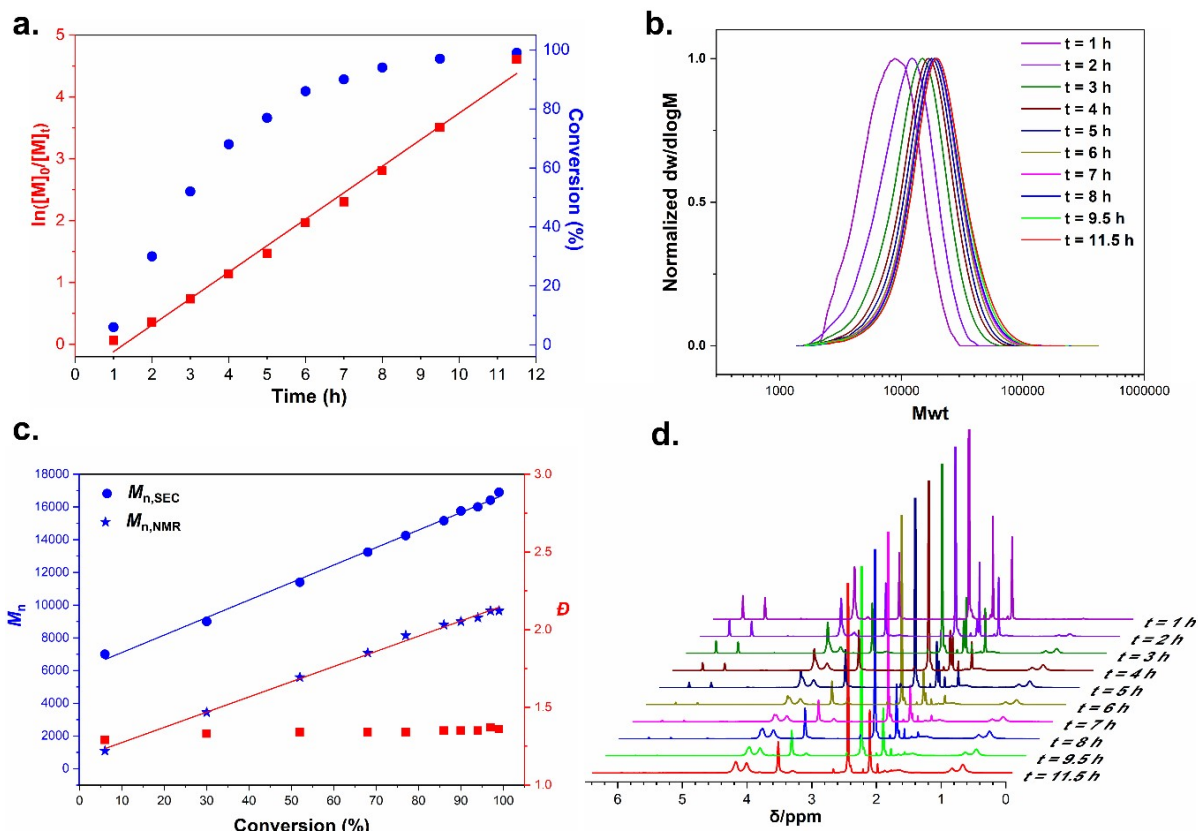

**Figure S22.** Polymerisation kinetics of the homopolymerisation of AEMA monomer *via* photo Cu-RDRP using MBPA initiator (a) kinetic plots of conversion and  $\ln([M]_0/[M]_t)$  vs time (b) SEC traces at different times intervals (c) molecular weight evolution and dispersity against time (d) respective  $^1\text{H-NMR}$  spectra in  $\text{DMSO-d}_6$  at different time intervals. Conditions:  $[\text{AEMA}]:[\text{Cu(II)Br}_2]:[\text{Me}_6\text{TREN}] = [40]:[0.05]:[0.36]$ .

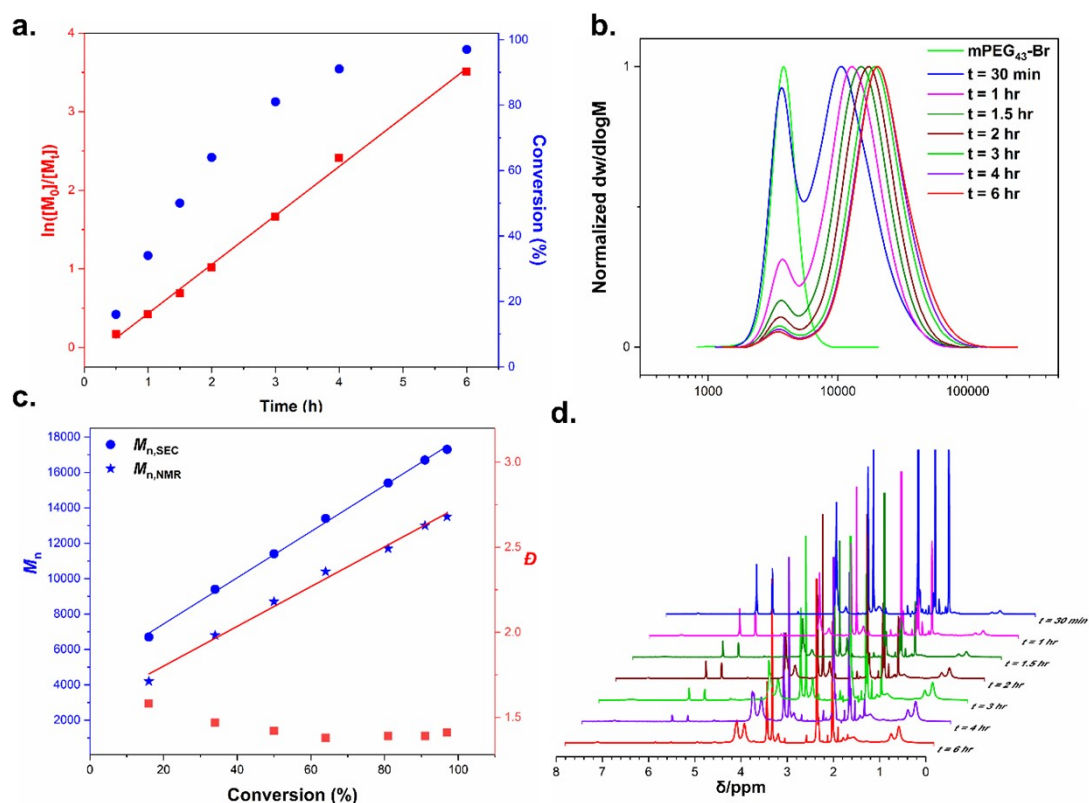

**Figure S23.** Polymerisation kinetics of the chain extension of AEMA with mPEG<sub>43</sub>-BPA macroinitiator *via* photo Cu-RDRP (a) kinetic plots of conversion and  $\ln([M]_0/[M]_t)$  vs time (b) SEC traces at different times intervals (c) molecular weight evolution and dispersity against time (d) respective <sup>1</sup>H-NMR spectra in DMSO-d<sub>6</sub> at different time intervals. Conditions: [AEMA]:[Cu(II)Br<sub>2</sub>]:[Me<sub>6</sub>TREN] = [55]:[0.05]:[0.36].

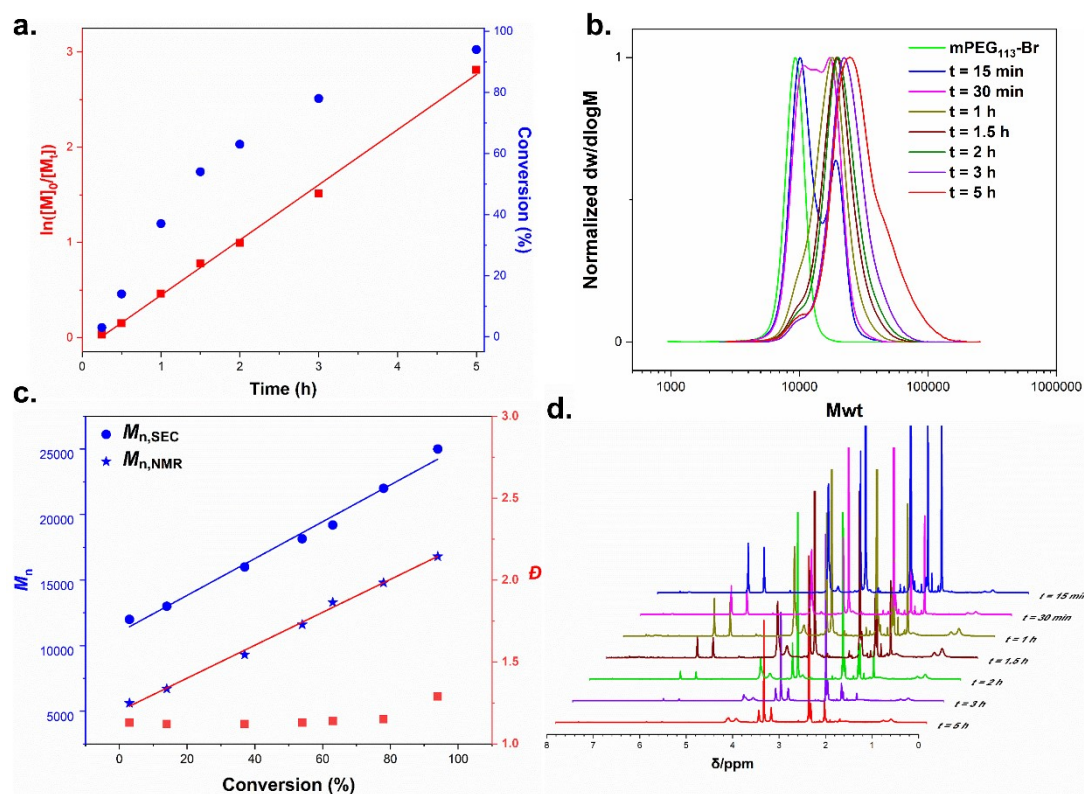

**Figure S24.** Polymerisation kinetics of the chain extension of AEMA with mPEG<sub>113</sub>-BPA macroinitiator *via* photo Cu-RDRP (a) kinetic plots of conversion and  $\ln([M]_0/[M]_t)$  vs time (b) SEC traces at different times intervals (c) molecular weight evolution and dispersity against time (d) respective  $^1\text{H-NMR}$  spectra in DMSO- $d_6$  at different time intervals. Conditions:  $[\text{AEMA}]:[\text{Cu(II)Br}_2]:[\text{Me}_6\text{TREN}] = [55]:[0.1]:[0.72]$ .

## 2.6 Modification results of pAEMA homopolymers with propylamine

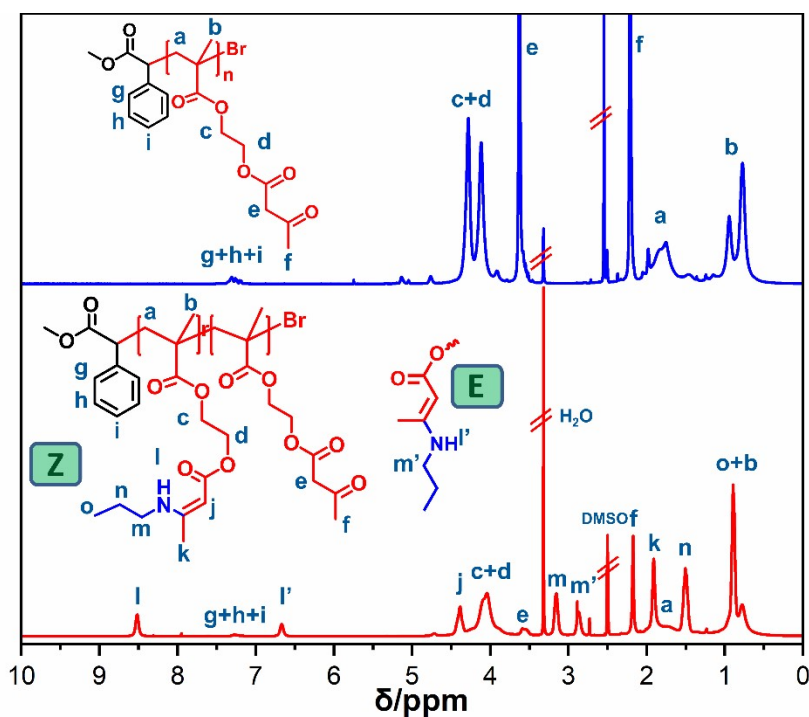

**Figure S25.** Assigned  $^1\text{H-NMR}$  (400 MHz,  $\text{DMSO-d}_6$ ) spectra of purified  $\text{pAEMA}_{42}/\text{PrA}$  with 93% modification efficiency.

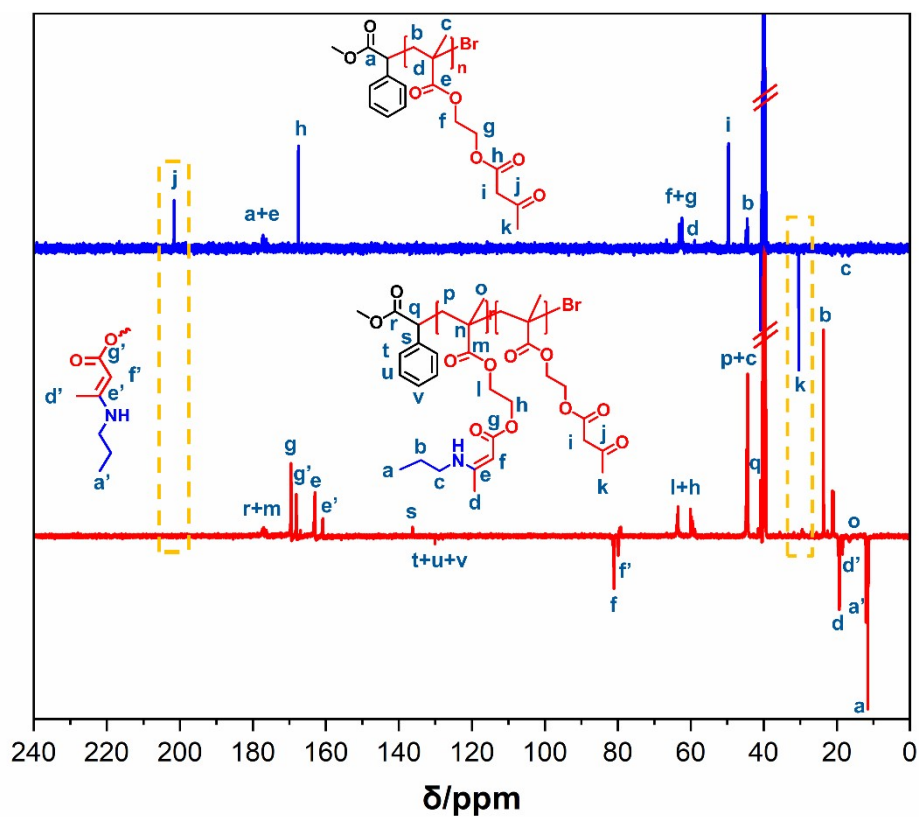

**Figure S26.** Assigned  $^{13}\text{C-NMR}$  (500 MHz,  $\text{DMSO-d}_6$ ) spectra of purified  $\text{pAEMA}_{42}/\text{PrA}$  with 93% modification efficiency.



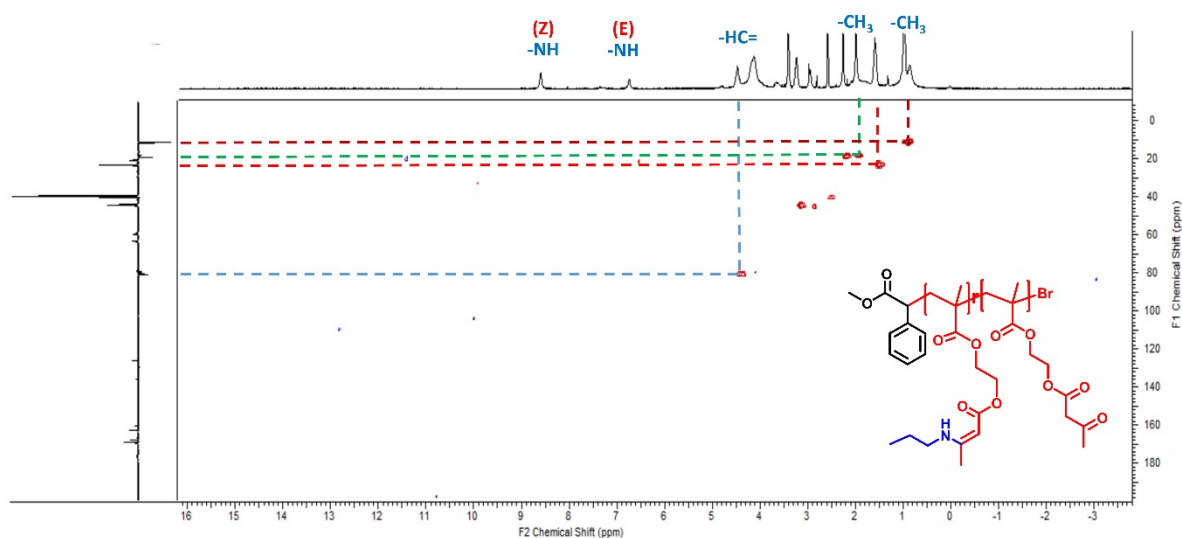

**Figure S27.** HSQC (400 MHz, DMSO- $d_6$ ) spectra of purified pAEMA<sub>42</sub>/PrA with 93% modification efficiency.

## 2.7 Hydrolysis experiment and proposed mechanism

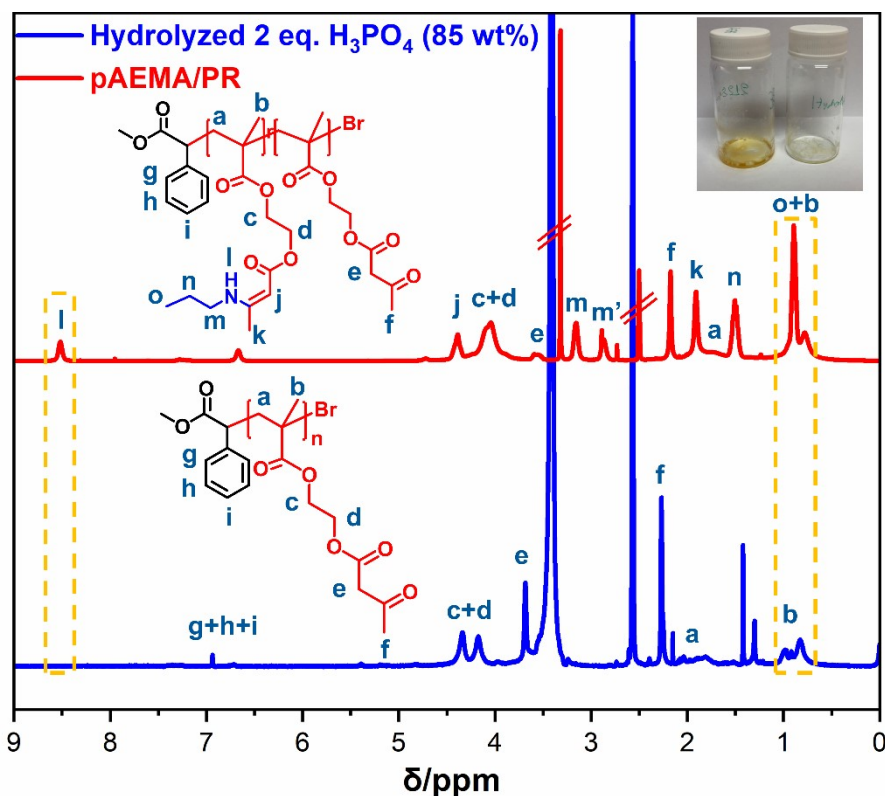

**Figure S28.**  $^1\text{H-NMR}$  (400 MHz, DMSO- $d_6$ ) comparison before and after hydrolysis of the enaminone bond by 2 eq. of  $\text{H}_3\text{PO}_4$  (85 wt %).

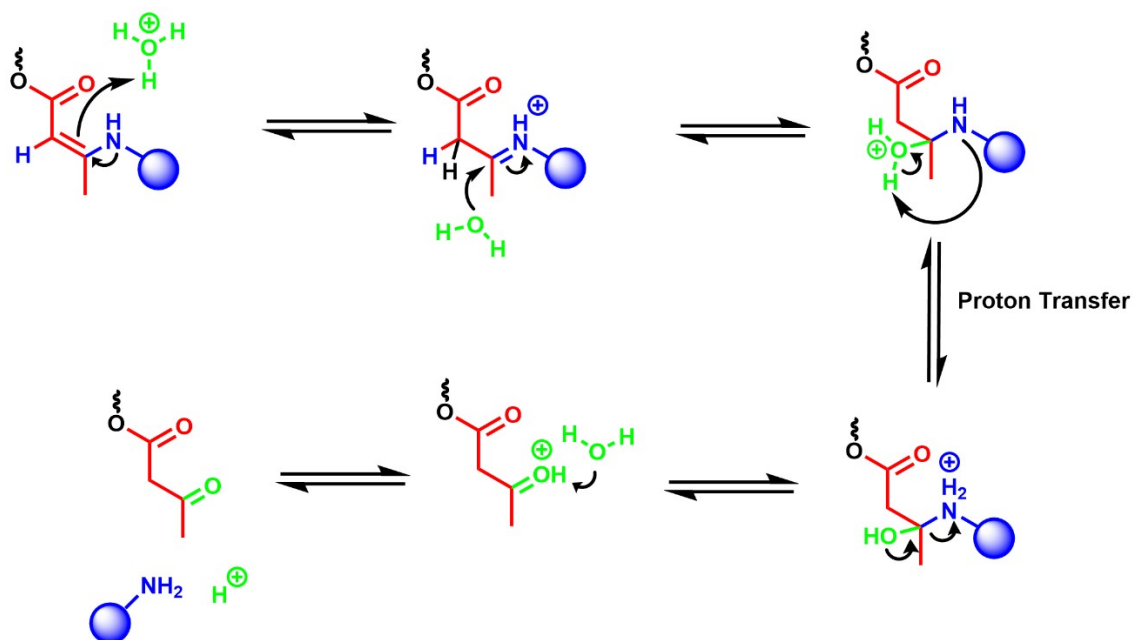

**Figure S29.** Proposed mechanism of enaminone hydrolysis under acidic conditions.<sup>3</sup>

## 2.8 Modification results of pAEMA<sub>x</sub> homopolymers and mPEG<sub>x</sub>-b-pAEMA<sub>y</sub> block copolymers with benzocaine

**Table S2.** Tabulated results from the modifications of pAEMA<sub>x</sub> (where x denotes the degree of polymerisation) with benzocaine.

| Entry <sup>1</sup> | pAEMA <sub>x</sub> | Benzocaine (eq.) | T (°C) | DP <sub>BNZ,NMR</sub> | Mod (%) |
|--------------------|--------------------|------------------|--------|-----------------------|---------|
| 1                  | 42                 | 0.5              | 25     | ~ 5                   | 13      |
| 2                  | 42                 | 1.0              | 25     | ~ 6                   | 15      |
| 3                  | 42                 | 2.0              | 25     | ~ 20                  | 50      |
| 4                  | 42                 | 6.0              | 25     | ~ 22                  | 55      |
| 5                  | 42                 | 2.0              | 30     | ~ 25                  | 63      |
| 6                  | 42                 | 6.0              | 30     | ~ 33                  | 83      |
| 7                  | 42                 | 2.0              | 40     | ~ 31                  | 78      |
| 8                  | 42                 | 6.0              | 40     | ~ 36                  | 85      |
| 9                  | 61                 | 6.0              | 40     | ~ 52                  | 87      |

<sup>1</sup>All modifications were conducted in CHCl<sub>3</sub> at a solid content of 0.22.

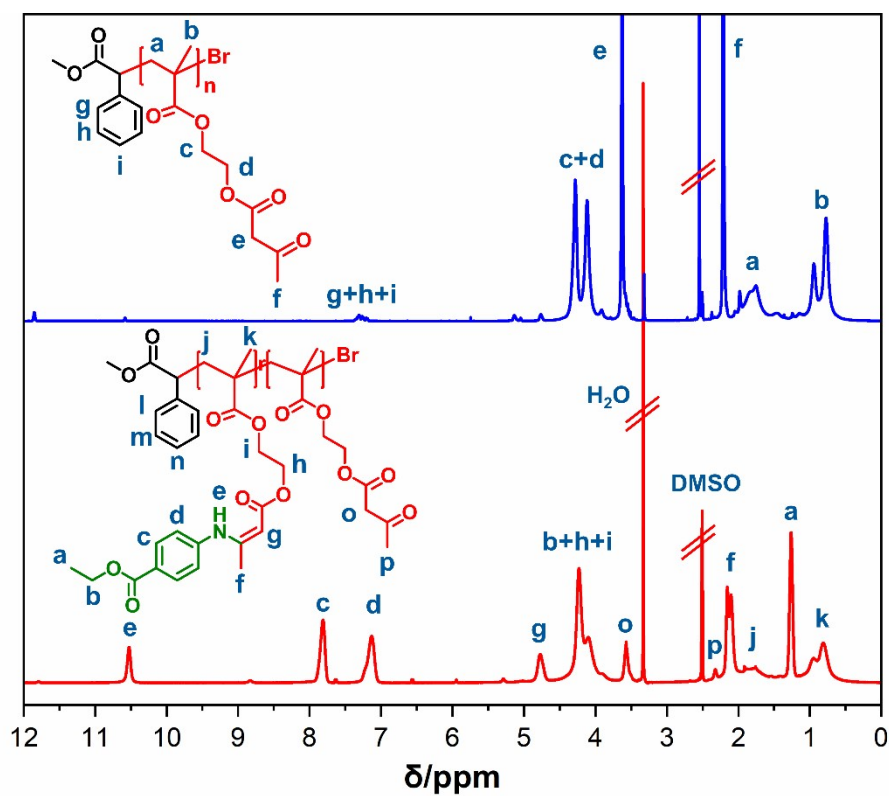

**Figure S30.**  $^1\text{H-NMR}$  (400 MHz,  $\text{DMSO-d}_6$ ) spectroscopy comparison of  $\text{pAEMA}_{61}$  homopolymer against the modified  $\text{pAEMA}_{61}/\text{BNZ}(87\%)$ .

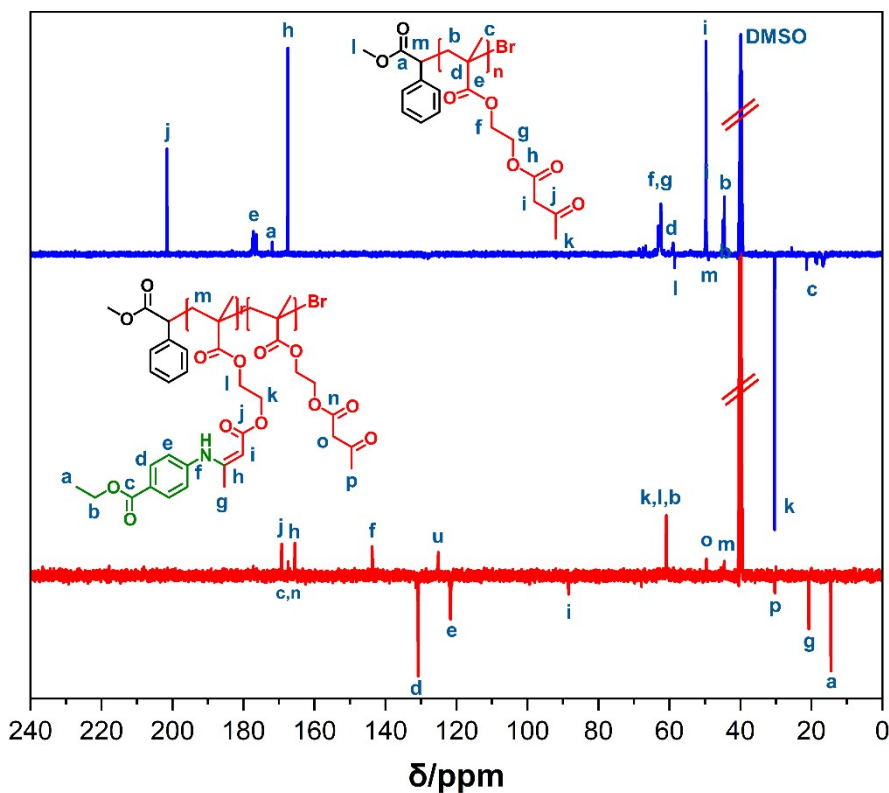

**Figure S31.**  $^{13}\text{C-NMR}$  (400 MHz,  $\text{DMSO-d}_6$ ) spectroscopy comparison of  $\text{pAEMA}_{61}$  homopolymer against the modified  $\text{pAEMA}_{61}/\text{BNZ}(87\%)$ .

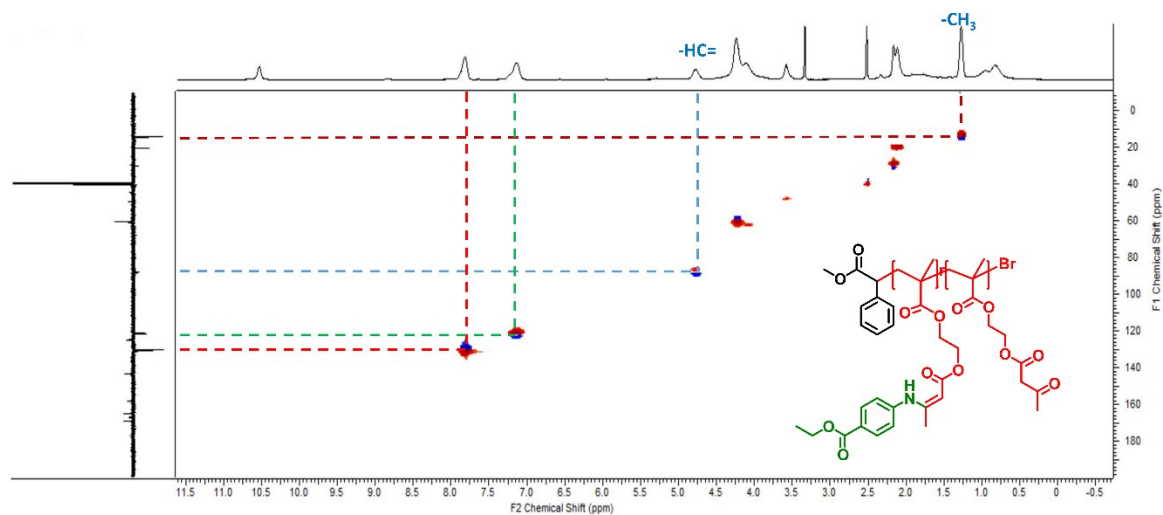

Figure S32. HSQC (400 MHz, DMSO- $d_6$ ) spectra of the modified pAEMA<sub>61</sub>/BNZ(87%).

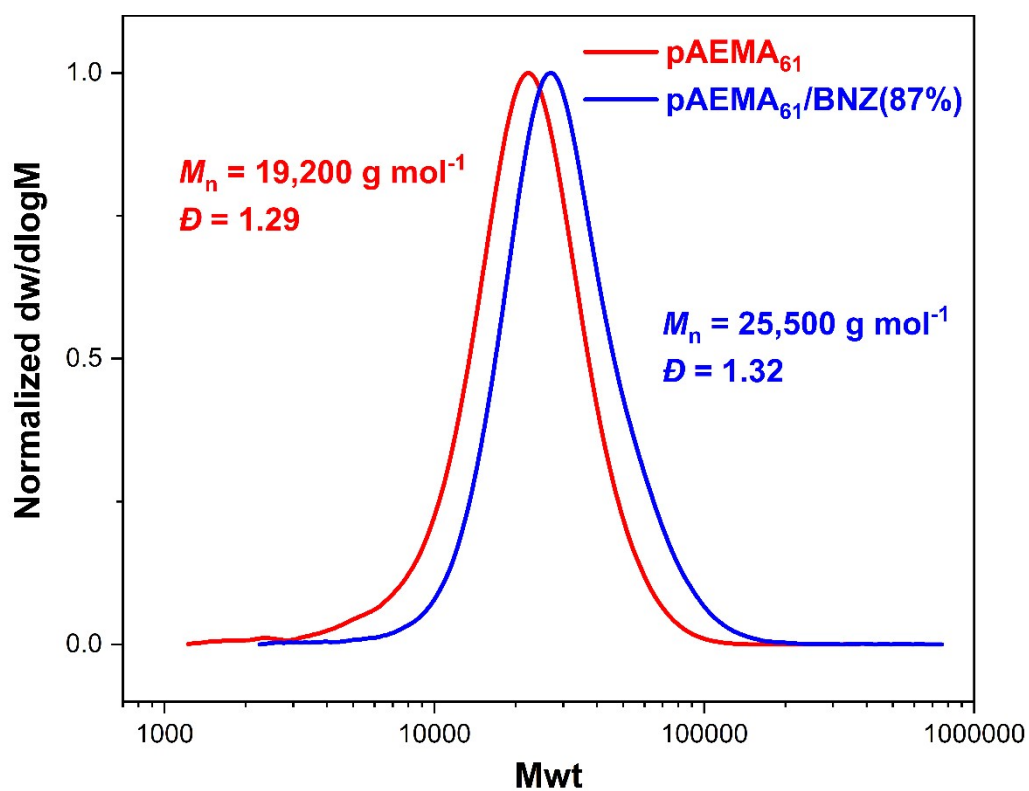

Figure S33. Molecular weight distribution traces before and after modification of pAEMA<sub>61</sub> homopolymers with benzocaine yielding pAEMA<sub>61</sub>/BNZ(87%) via SEC in DMF.

**Table S3.** Tabulated results from the modifications of mPEG<sub>x</sub>-*b*-pAEMA<sub>y</sub> (x =43 or 113) block copolymers with benzocaine.

| Blocks                                              | Benzocaine (eq.) | <i>p</i> -TsOH (mol %) | Solvent           | T (°C) | DP <sub>BNZ,NMR</sub> | Mod (%) |
|-----------------------------------------------------|------------------|------------------------|-------------------|--------|-----------------------|---------|
| mPEG <sub>43</sub> - <i>b</i> -pAEMA <sub>84</sub>  | 1                | -                      | CHCl <sub>3</sub> | 25     | ~ 7                   | 8       |
| mPEG <sub>43</sub> - <i>b</i> -pAEMA <sub>84</sub>  | 2                | -                      | CHCl <sub>3</sub> | 25     | ~ 13                  | 15      |
| mPEG <sub>113</sub> - <i>b</i> -pAEMA <sub>52</sub> | 2                | -                      | CHCl <sub>3</sub> | 40     | -                     | -       |
| mPEG <sub>113</sub> - <i>b</i> -pAEMA <sub>52</sub> | 6                | -                      | CHCl <sub>3</sub> | 40     | -                     | -       |
| mPEG <sub>113</sub> - <i>b</i> -pAEMA <sub>52</sub> | 6                | -                      | THF               | 60*    | -                     | -       |
| mPEG <sub>113</sub> - <i>b</i> -pAEMA <sub>52</sub> | 6                | 5                      | THF               | 40     | ~ 20                  | 38      |
| mPEG <sub>113</sub> - <i>b</i> -pAEMA <sub>52</sub> | 6                | 5                      | CHCl <sub>3</sub> | 40     | ~ 24                  | 47      |
| mPEG <sub>113</sub> - <i>b</i> -pAEMA <sub>52</sub> | 6                | 5                      | DMSO              | 40     | ~ 30                  | 58      |
| mPEG <sub>113</sub> - <i>b</i> -pAEMA <sub>28</sub> | 3                | -                      | CHCl <sub>3</sub> | 40     | -                     | -       |
| mPEG <sub>113</sub> - <i>b</i> -pAEMA <sub>28</sub> | 6                | -                      | CHCl <sub>3</sub> | 40     | -                     | -       |
| mPEG <sub>113</sub> - <i>b</i> -pAEMA <sub>28</sub> | 6                | 5                      | DMSO              | 40     | ~ 20                  | 70      |

\* Performed under reflux conditions

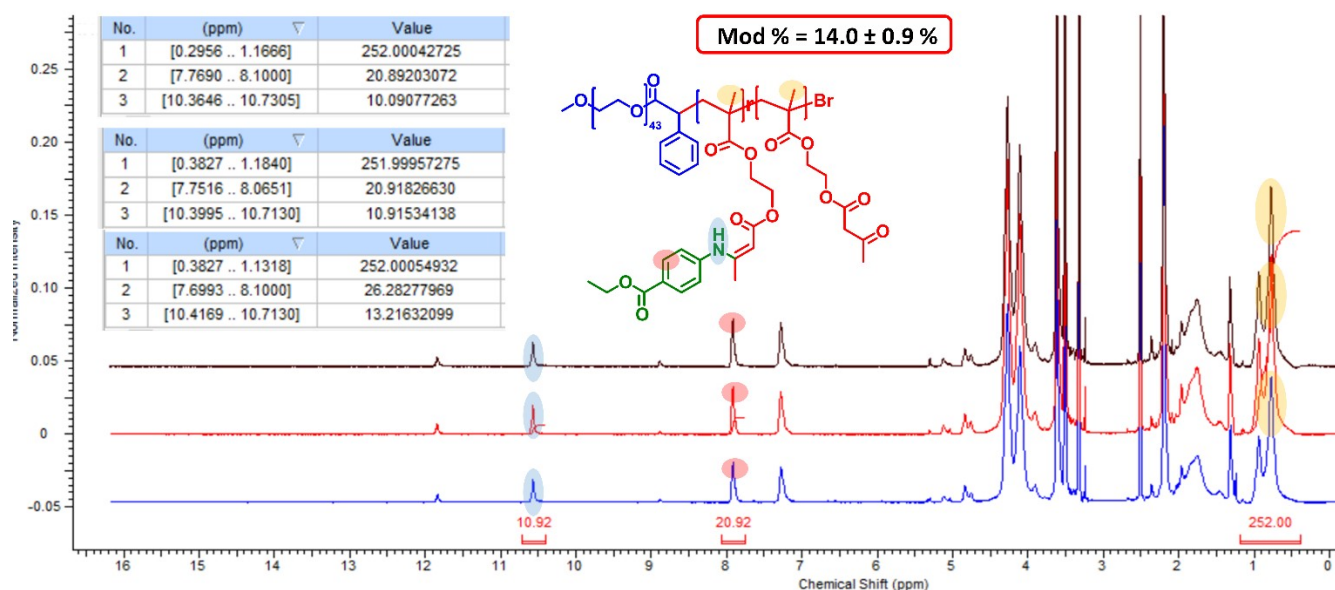

**Figure S34.** Combined <sup>1</sup>H-NMR spectra from the reproducibility study of the block copolymer modification with benzocaine along with the appropriate integrations. Data are presented as mean ± SD (n =3 ).

## 2.9 Thermal Characterisation of synthesised products

**Table S4.** DSC tabulated results from the synthesised homopolymers, block copolymers and their benzocaine modified analogues as determined from their 2<sup>nd</sup> thermal cycle.

| Entry | Polymers                                                      | $T_{g,onset}$<br>(°C) | $T_{g,midpoint}$<br>(°C) |
|-------|---------------------------------------------------------------|-----------------------|--------------------------|
| 1     | pAEMA <sub>22</sub>                                           | - 3                   | 7                        |
| 2     | pAEMA <sub>42</sub>                                           | - 4                   | 6                        |
| 3     | pAEMA <sub>61</sub>                                           | - 3                   | 6                        |
| 4     | pAEMA <sub>42</sub> /BNZ(55%)                                 | 31                    | 36                       |
| 5     | pAEMA <sub>42</sub> /BNZ(85%)                                 | 48                    | 54                       |
| 8     | mPEG <sub>43</sub> - <i>b</i> -pAEMA <sub>84</sub>            | - 4                   | 2                        |
| 9     | mPEG <sub>43</sub> - <i>b</i> -pAEMA <sub>84</sub> /BNZ(15%)  | 4                     | 9                        |
| 10    | mPEG <sub>113</sub> - <i>b</i> -pAEMA <sub>28</sub>           | - 27                  | - 18                     |
| 11    | mPEG <sub>113</sub> - <i>b</i> -pAEMA <sub>52</sub>           | - 21                  | - 15                     |
| 12    | mPEG <sub>113</sub> - <i>b</i> -pAEMA <sub>110</sub>          | - 13                  | - 7                      |
| 13    | mPEG <sub>113</sub> - <i>b</i> -pAEMA <sub>28</sub> /BNZ(70%) | - 33                  | -21                      |
| 14    | mPEG <sub>113</sub> - <i>b</i> -pAEMA <sub>52</sub> /BNZ(38%) | 11                    | 20                       |
| 15    | mPEG <sub>113</sub> - <i>b</i> -pAEMA <sub>52</sub> /BNZ(58%) | 11                    | 25                       |

## 2.10 Stability studies, DLS and Zeta potential data of block copolymers

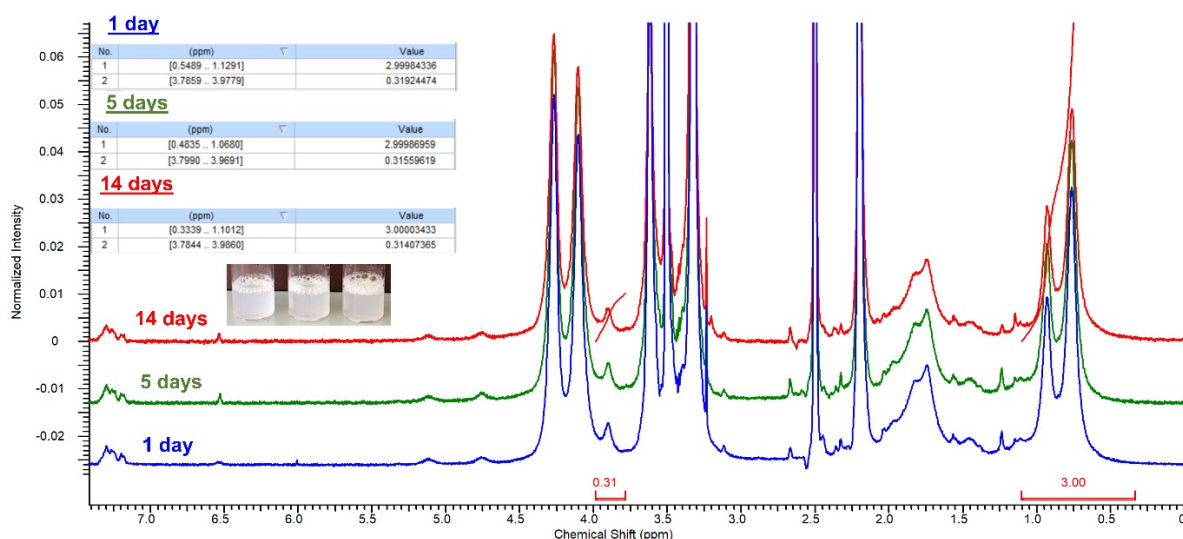

**Figure S35.** Overlaid <sup>1</sup>H-NMR (400 MHz, DMSO-d<sub>6</sub>) spectra from the stability study performed on mPEG<sub>43</sub>-*b*-pAEMA<sub>25</sub> micelles in H<sub>2</sub>O (5 mg mL<sup>-1</sup>) over a period of two weeks.

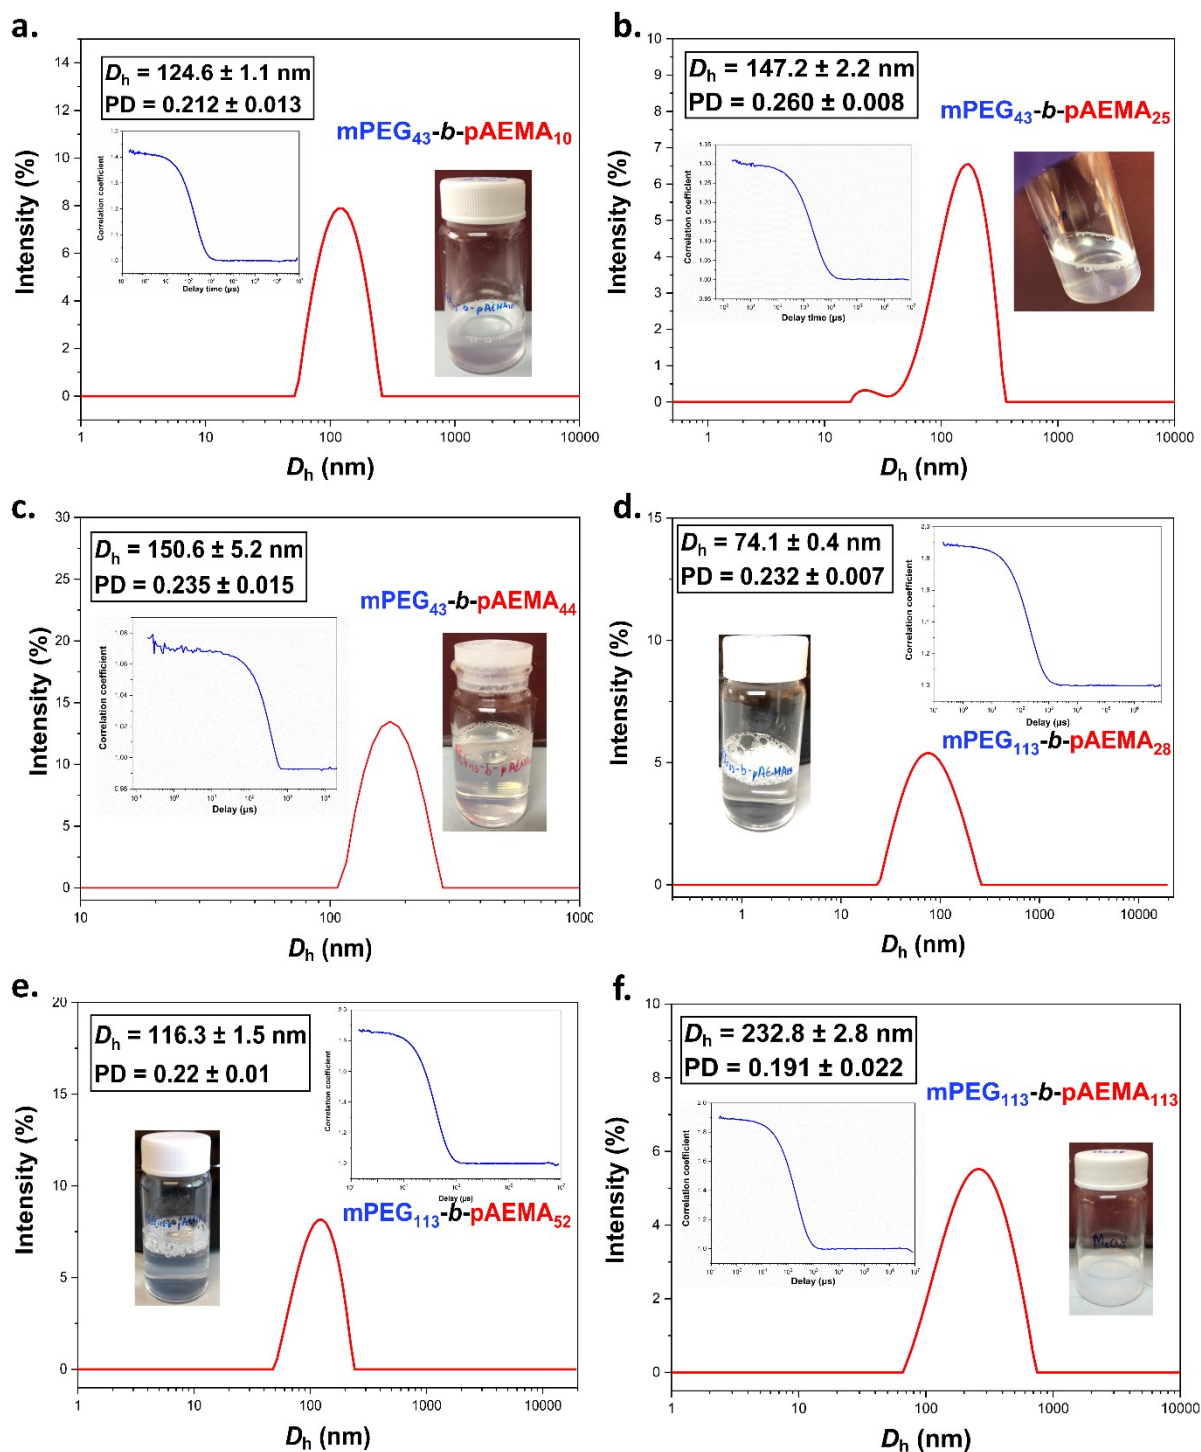

**Figure S36.** Intensity-weighted size distributions along with their collograms obtained by DLS at a concentration of  $0.5 \text{ mg mL}^{-1}$  for a) mPEG<sub>43</sub>-b-pAEMA<sub>10</sub> in water b) mPEG<sub>43</sub>-b-pAEMA<sub>25</sub> in water c) mPEG<sub>43</sub>-b-pAEMA<sub>44</sub> in methanol d) mPEG<sub>113</sub>-b-pAEMA<sub>28</sub> in water e) mPEG<sub>113</sub>-b-pAEMA<sub>52</sub> in water and f) mPEG<sub>113</sub>-b-pAEMA<sub>113</sub> in methanol.

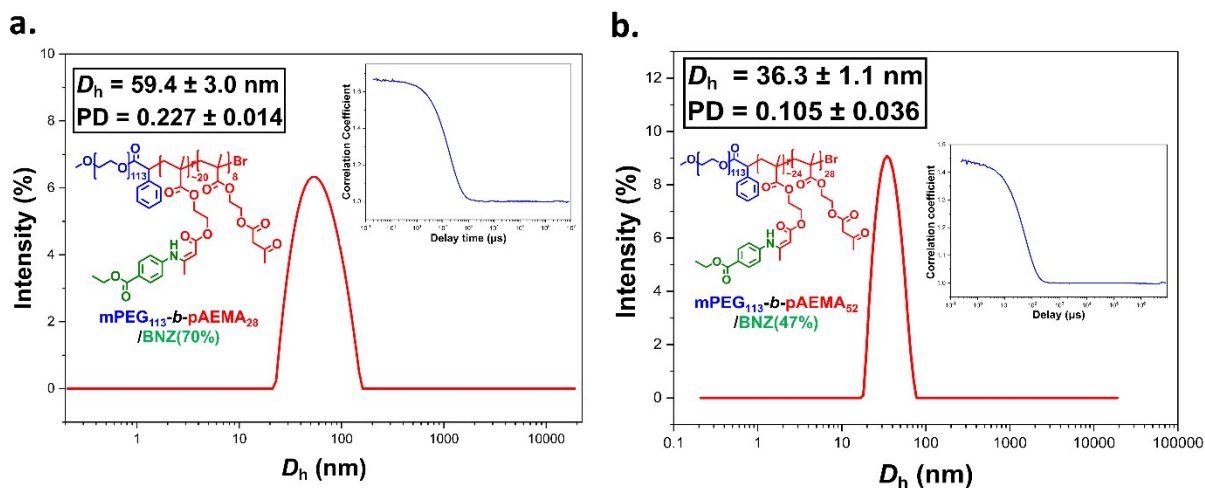

**Figure S37.** Intensity-weighted size distributions along with their collerograms obtained by DLS at a concentration of  $0.5 \text{ mg mL}^{-1}$  in water for a)  $\text{mPEG}_{113}\text{-}b\text{-pAEMA}_{28}/\text{BNZ}(70\%)$  and b)  $\text{mPEG}_{113}\text{-}b\text{-pAEMA}_{52}/\text{BNZ}(47\%)$ .

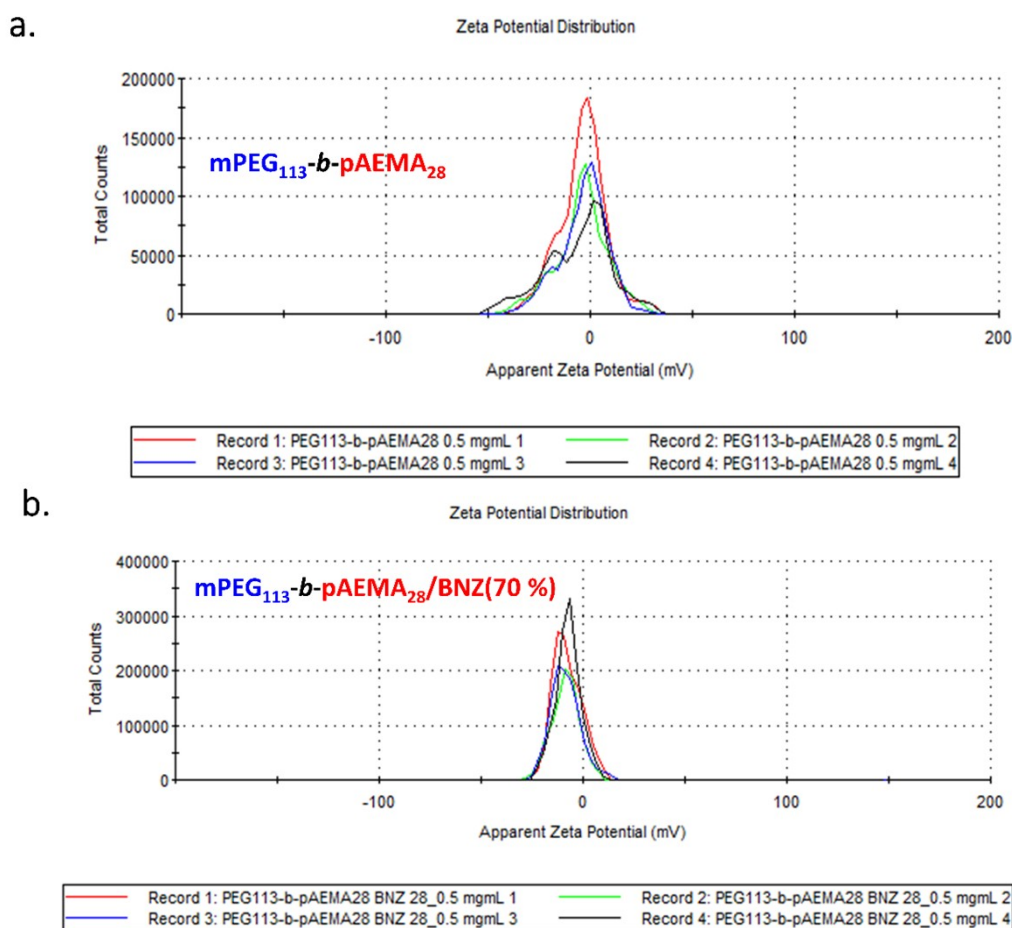



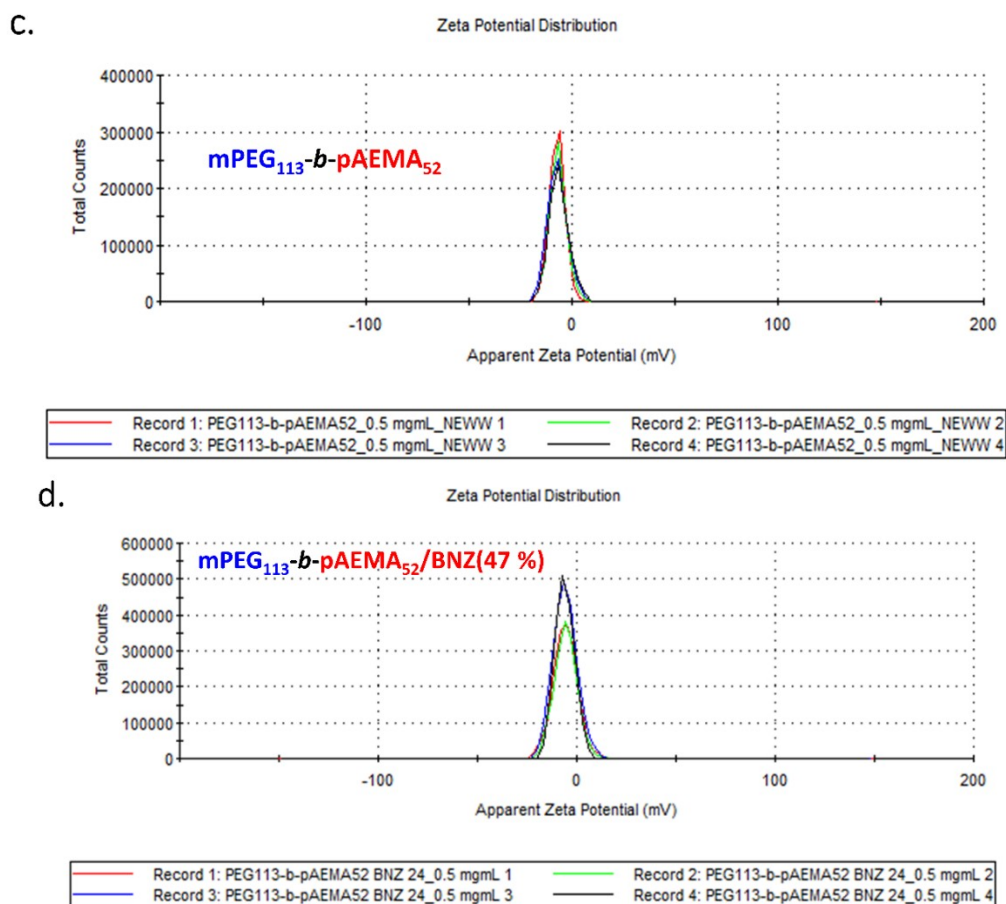

**Figure S38.** Zeta potential analysis of pristine and modified with benzocaine block copolymer assemblies in DI water (pH = 7) at a concentration of  $0.5 \text{ mg mL}^{-1}$  for a)  $\text{mPEG}_{113}\text{-b-pAEMA}_{28}$  b)  $\text{mPEG}_{113}\text{-b-pAEMA}_{28}/\text{BNZ}(70\%)$  c)  $\text{mPEG}_{113}\text{-b-pAEMA}_{52}$  and d)  $\text{mPEG}_{113}\text{-b-pAEMA}_{52}/\text{BNZ}(47\%)$ .

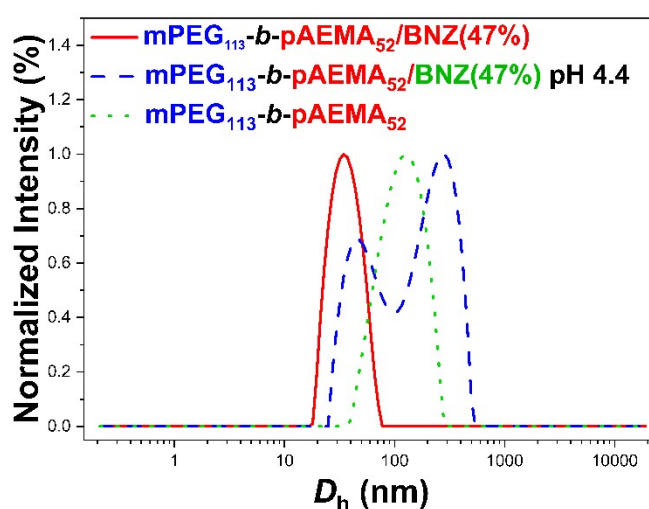

**Figure S39.** DLS comparison of  $\text{mPEG}_{113}\text{-b-pAEMA}_{28}/\text{BNZ}(47\%)$  NPs after hydrolysis for 2 days in pH = 4.4.

## 2.11 Benzocaine release UV data at different pH environments

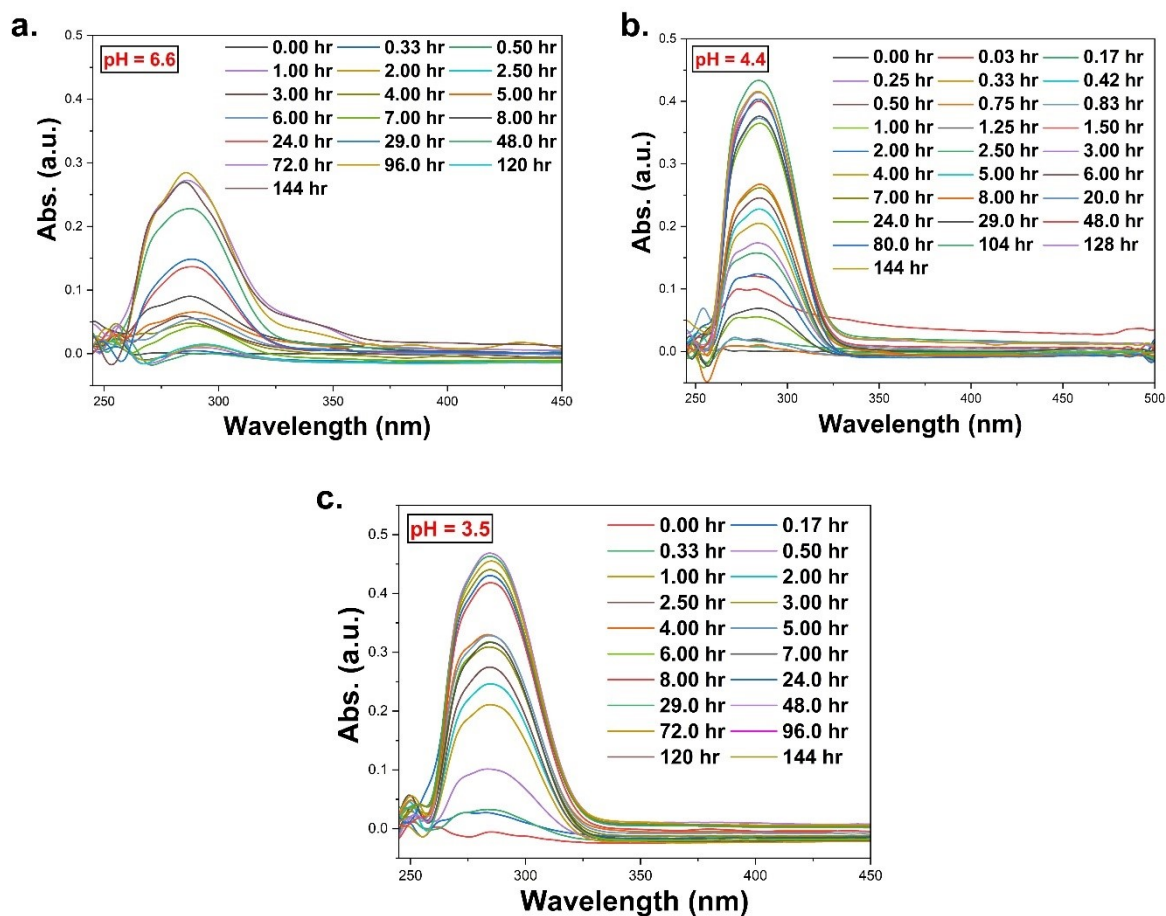

**Figure S40.** UV spectra during the release of BNZ at different time intervals at a) pH 6.6 (initial dose : 1400  $\mu\text{g}$  BNZ), b) pH 4.4 (initial dose : 700  $\mu\text{g}$  BNZ ) and c) pH 3.5 (initial dose : 500  $\mu\text{g}$  BNZ).

## 3 References

1. M. Ciampolini and N. Nardi, *Inorg. Chem.*, 1966, **5**, 41-44.
2. A. M. Eissa, A. Abdulkarim, G. J. Sharples and N. R. Cameron, *Biomacromolecules*, 2016, **17**, 2672-2679.
3. P. Y. Sollenberger and R. B. Martin, *J. Am. Chem. Soc.*, 1970, **92**, 4261-4270.
